# Supplementary material
Source: publisher figshare collection journal article supplement (https://acs.figshare.com/ndownloader/files/5077192)
Supplement: Supplementary file 1 [file 5077192]

**Supporting Information**

**Selective *Endo*- and *Exo*-iodocyclisation in the Synthesis of Nitrogen  
Heterocycles.**

*Karl O. Hessian and Bernard L. Flynn\**

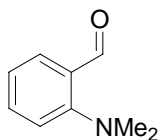

### 2-Dimethylamino benzaldehyde (9)

Prepared by the literature procedure of P. Damhaut *Tetrahedron*. **1997**, 53, 5785.

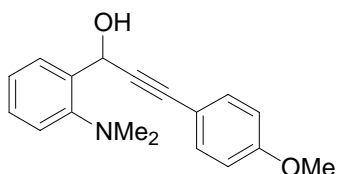

### 1-(2-Dimethylaminophenyl)-3-(4-methoxyphenyl)prop-2-yn-1-ol (10a)

To a stirred solution of  $\beta,\beta$ -dibromo-4-methoxybenzene (848 mg, 2.92 mmol) in THF (20 mL) at  $-78\text{ }^{\circ}\text{C}$  (dry-ice / acetone bath) was added dropwise a solution of *n*-butyllithium (2.97 mL in hexanes, 5.94 mmol), and the solution left to stir for 0.25 h. After this time, the solution was warmed to room temperature, and then recooled to  $-78\text{ }^{\circ}\text{C}$ . A solution of **9** (429 mg, 2.88 mmol) in THF (5 mL) was added, and then warmed to room temperature. After stirring for a further 0.15 h, the solution was concentrated under reduced pressure to remove the greater part of solvent. The residue was quenched with  $\text{NH}_4\text{Cl}_{(\text{aq})}$  (50 mL, sat.), and extracted with diethyl ether (3 x 50 mL), dried over  $\text{MgSO}_4$ , filtered and concentrated to give the product as a pale yellow oil (810 mg, 100 %).

$^1\text{H-NMR}$  ( $\text{CDCl}_3$ )  $\delta$  7.45 (d,  $J = 7.8\text{ Hz}$ , 1H), 7.36 (d,  $J = 8.4\text{ Hz}$ , 2H), 7.31 – 7.33 (m, 2H), 7.15 – 7.21 (m, 1H), 6.83 (d,  $J = 8.4\text{ Hz}$ , 2H), 5.84 (s, 1H), 3.78 (s, 3H), 2.80 (s, 6H).  $^{13}\text{C-NMR}$  ( $\text{CDCl}_3$ )  $\delta$  159.5 (C), 151.4 (C), 135.8 (C), 132.9 (C-H), 128.7 (C-H), 128.1 (C-H), 125.5 (C-H), 121.7 (C-H), 114.9 (C), 113.7 (C-H), 88.5 (C), 86.1 (C), 64.9 (C-OH), 55.2 ( $\text{CH}_3$ ), 45.6 ( $\text{CH}_3$ ). LRMS  $m/z$ : 281.0 (94). HRMS  $m/z$ :  $\text{M}^+$  calculated for  $\text{C}_{18}\text{H}_{19}\text{NO}_2$ : 281.1416. Found: 281.1414.

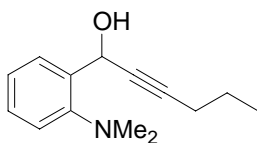

### 1-(2-Dimethylaminophenyl)hex-2-yn-ol (10b)

To a stirred solution of pentyne (520 mg, 7.65 mmol) in THF (15 mL) at 0 °C (ice bath) was added dropwise a solution of *n*-butyllithium (4.00 mL in hexanes, 6.96 mmol), and the solution left to stir for 0.25 h. After this time, a solution of **9** (1.00 g, 6.71 mmol) in THF (5 mL) was added, and the ice bath removed. After stirring for a further 0.15 h, the solution was concentrated under reduced pressure to remove the greater part of solvent. The residue was quenched with NH<sub>4</sub>Cl<sub>(aq)</sub> (50 mL, sat.), and extracted with diethyl ether (3 x 50 mL), dried over MgSO<sub>4</sub>, filtered and concentrated to give the product as a pale yellow oil (1.45 g, 100 %).

<sup>1</sup>H-NMR (300 MHz, CDCl<sub>3</sub>) δ 7.39 (d, *J* = 7.2 Hz, 1H), 7.23 – 7.26 (m, 2H), 7.09 – 7.14 (m, 1H), 6.92 (bs, 1H), 5.65 (t, *J* = 1.8 Hz, 1H), 2.73 (s, 6H), 2.20 (dt, *J* = 1.2, 7.2 Hz, 2H), 1.52 (sextet, *J* = 7.2 Hz, 2H), 0.95 (t, *J* = 7.2 Hz, 3H). <sup>13</sup>C-NMR (CDCl<sub>3</sub>) δ 151.3 (C), 136.3 (C), 128.5 (C-H), 128.0 (C-H), 125.1 (C-H), 121.1 (C-H), 86.7 (C), 81.2 (C), 63.6 (C-OH), 45.4 (CH<sub>3</sub>), 21.9 (CH<sub>2</sub>), 20.8 (CH<sub>2</sub>), 13.4 (CH<sub>3</sub>).

LRESMS *m/z*: C<sub>14</sub>H<sub>20</sub>NO<sup>+</sup> = 218.2 (100).

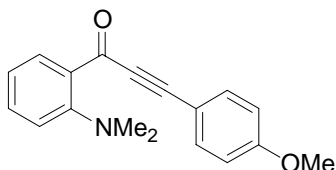

### 1-(2-Dimethylaminophenyl)-3-(4-methoxyphenyl)prop-2-yn-1-one (11a)

To a stirred solution of **10a** (709 mg, 2.52 mmol) in CH<sub>2</sub>Cl<sub>2</sub> (80 mL), was added commercially available MnO<sub>2</sub> (6.96 g, 75 % activated) portionwise over 0.15 h. After stirring for a further 0.25 h, the solution was filtered through celite (4 cm) with CH<sub>2</sub>Cl<sub>2</sub> (250 mL), and the yellow filtrate solution concentrated under reduced

pressure (without heating above 25 °C) onto silica gel (6 g). The residue was subjected to flash chromatography (silica gel, eluent: ethyl acetate, DCM, hexanes 1:2:7, then 2:2:6) to give the product as an orange resin (632 mg, 90 %).

$^1\text{H-NMR}$  ( $\text{CDCl}_3$ )  $\delta$  8.12 (dd,  $J = 1.2, 7.8$  Hz, 1H), 7.59 (d,  $J = 8.7$  Hz, 2H), 7.42 (dt,  $J = 1.2, 8.4$  Hz, 1H), 7.02 (d,  $J = 8.1$  Hz, 1H), 6.87 – 6.96 (m, 3H), 3.85 (s, 3H), 2.96 (s, 6H).  $^{13}\text{C-NMR}$  ( $\text{CDCl}_3$ )  $\delta$  177.8 (C), 161.3 (C), 152.5 (C), 134.8 (C-H), 133.6 (C-H), 133.4 (C-H), 126.6 (C), 117.8 (C-H), 116.4 (C-H), 114.3 (C-H), 112.5 (C), 91.4 (C), 88.5 (C), 55.3 ( $\text{CH}_3$ ), 43.9 ( $\text{CH}_3$ ). LRESMS  $m/z$ :  $\text{C}_{18}\text{H}_{18}\text{NO}_2^+ = 280.2$  (100). HRESMS  $m/z$ :  $\text{M}^+$  calculated for  $\text{C}_{18}\text{H}_{18}\text{NO}_2^+$ : 280.1332. Found = 280.1329.

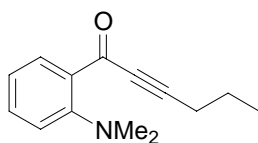

### 1-(2-Dimethylaminophenyl)hex-2-yn-one (**11b**)

To a stirred solution of **10b** (1.45 g, 6.68 mmol) in  $\text{CH}_2\text{Cl}_2$  (100 mL), was added commercially available  $\text{MnO}_2$  (14.5 g, 75 % activated) portionwise over 0.1 h. After stirring for a further 0.25 h, the solution was filtered through celite (4 cm) with  $\text{CH}_2\text{Cl}_2$  (400 mL), and the yellow filtrate concentrated under reduced pressure onto silica gel (10 g). The residue was subjected to flash chromatography (silica gel, eluent: ethyl acetate, hexanes 1:19, then 1:9) to give the desired product as a yellow oil (1.38 g, 96 %).

$^1\text{H-NMR}$  (300 MHz,  $\text{CDCl}_3$ )  $\delta$  8.08 (d,  $J = 7.5$  Hz, 1H), 7.41 (t,  $J = 8.4$  Hz, 1H), 7.05 (m, 1H), 6.90 (t,  $J = 7.2$  Hz), 2.93 (s, 6H), 2.44 (t,  $J = 6.9$  Hz, 2H), 1.68 (sextet,  $J = 7.2$  Hz, 2H), 1.07 (t,  $J = 7.2$  Hz, 3H).  $^{13}\text{C-NMR}$  ( $\text{CDCl}_3$ )  $\delta$  177.8 (C), 152.4 (C), 133.8 (C-H), 133.4 (C-H), 126.3 (C), 117.7 (C-H), 116.3 (C-H), 93.7 (C), 81.4 (C), 43.8 ( $\text{CH}_3$ ), 21.3 ( $\text{CH}_2$ ), 21.0 ( $\text{CH}_2$ ), 13.5 ( $\text{CH}_3$ ). LRESMS  $m/z$ :  $\text{C}_{14}\text{H}_{18}\text{NO}^+ = 216.1$  (100). HRESMS  $m/z$ :  $\text{M}^+$  calculated for  $\text{C}_{14}\text{H}_{18}\text{NO}^+$ : 216.1383. Found: 216.1379.

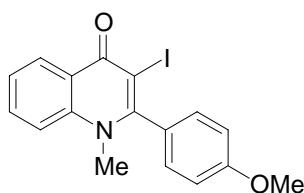

### 3-Iodo-2-(4-methoxyphenyl)-1-methylquinolin-4-one (13a)

To a stirred solution of **11a** (100 mg, 0.358 mmol) in CH<sub>2</sub>Cl<sub>2</sub> (6 mL) was added a solution of iodine (91 mg, 0.358 mmol) in CH<sub>2</sub>Cl<sub>2</sub> (4 mL) and stirred for 0.5 h. After this time, the solution was quenched with Na<sub>2</sub>S<sub>2</sub>O<sub>5(aq)</sub> (15 mL, 10 % sol.), extracted with CH<sub>2</sub>Cl<sub>2</sub> (3 x 20 mL), dried over Na<sub>2</sub>SO<sub>4</sub>, and concentrated under reduced pressure onto silica gel. The residue was subjected to flash chromatography (silica gel, eluent: ethyl acetate, DCM, hexanes 2:1:7, then 4:1:5) to give the product as a yellow solid (131 mg, 94 %), mp = 179-181 °C.

<sup>1</sup>H-NMR (CDCl<sub>3</sub>) δ 8.55 (dd, *J* = 1.5, 8.1 Hz, 1H), 7.72 (dt, *J* = 1.5, 7.5 Hz, 1H), 7.54 (d, *J* = 8.7 Hz, 1H), 7.44 (t, *J* = 7.5 Hz, 1H), 7.21 (d, *J* = 8.7 Hz, 2H), 7.08 (d, *J* = 8.7 Hz, 2H), 3.91 (s, 3H), 3.61 (s, 3H). <sup>13</sup>C-NMR (CDCl<sub>3</sub>) δ 174.0 (C), 160.3 (C), 155.3 (C), 140.7 (C), 132.5 (C-H), 131.7 (C), 129.7 (C-H), 127.6 (C-H), 124.3 (C-H), 122.8 (C), 115.7 (C-H), 114.4 (C-H), 89.8 (C-I), 55.4 (CH<sub>3</sub>), 39.2 (CH<sub>3</sub>). LRESMS *m/z*: C<sub>17</sub>H<sub>15</sub>NO<sub>2</sub>I<sup>+</sup> = 392.1 (100). HRESMS *m/z*: M<sup>+</sup> calculated for C<sub>17</sub>H<sub>15</sub>NO<sub>2</sub>I<sup>+</sup> = 392.0142. Found: 392.0137.

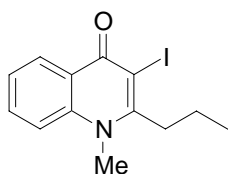

### 3-Iodo-1-methyl-2-propylquinolin-4-one (13b)

Iodine (175 mg, 0.689 mmol) was added to a solution of **11b** (145 mg, 0.674 mmol) in CH<sub>2</sub>Cl<sub>2</sub> (10 mL), protected from light and left to stir for 1 h. After this time, the

solution was quenched with a solution of  $\text{Na}_2\text{S}_2\text{O}_5(\text{aq})$  (20 mL, sat %), and extracted with  $\text{CH}_2\text{Cl}_2$  (2 x 10 mL). The combined organic layers were dried over  $\text{Na}_2\text{SO}_4$ , and concentrated under reduced pressure onto silica gel (2 g). The residue was quickly subjected to flash chromatography (silica gel, eluent diethyl ether : hexanes, 1 : 9, then 1 : 4) to give the desired product as an orange solid (190 mg, 86 %).

$^1\text{H}$ -NMR (300 MHz,  $\text{CD}_3\text{CN}$ )  $\delta$  7.50 – 7.55 (m, 2H), 6.98 (d,  $J$  = 8.4 Hz, 1H), 6.88 (dt,  $J$  = 0.6, 6.9 Hz, 1H), 3.39 (s, 3H), 3.06 (d,  $J$  = 7.8 Hz, 2H), 1.69 (septet,  $J$  = 7.5 Hz, 2H), 0.97 (t,  $J$  = 9.0 Hz, 3H).  $^{13}\text{C}$ -NMR ( $\text{CD}_3\text{CN}$ )  $\delta$  184.2 (C), 153.5 (C), 137.5 (C), 136.4 (C-H), 124.0 (C-H), 120.6 (C), 119.8 (C-H), 109.7 (C-H), 91.7 (C-I), 45.2 ( $\text{CH}_2$ ), 35.8 ( $\text{CH}_3$ ), 23.9 ( $\text{CH}_2$ ), 12.6 ( $\text{CH}_3$ ). LRESMS  $m/z$ :  $\text{C}_{13}\text{H}_{15}\text{NOI}^+$  = 328.1 (100). HRESMS  $m/z$ :  $\text{M}^+$  calculated for  $\text{C}_{13}\text{H}_{15}\text{NOI}^+$ : 328.0193. Found: 328.0191.

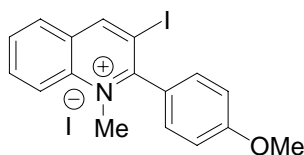

### 3-Iodo-2-(4-methoxyphenyl)-1-methylquinolinium iodide (15a)

A solution of iodine (86 mg, 0.339 mmol) in  $\text{CH}_3\text{CN}$  (3 mL) was added to a stirred solution of **10a** (95 mg, 0.338 mmol) in  $\text{CH}_3\text{CN}$  (2 mL), and stirred for 0.5 h. After this time, the solution was heated to 65 °C and stirred for 2 h. After this time, the solution was cooled to room temperature, and concentrated under reduced pressure to give a brown residue. The residue was recrystallised from DMF to give the product as red needles (151 mg, 89 %), mp = 136-138 °C.

$^1\text{H}$ -NMR ( $\text{D}^6$ -DMSO)  $\delta$  9.89 (s, 1H), 8.51 (d,  $J$  = 7.7 Hz, 1H), 8.40 (d,  $J$  = 7.1 Hz, 1H), 8.30 (t,  $J$  = 7.1 Hz, 1H), 8.06 (t,  $J$  = 7.7 Hz, 1H), 7.51 (d,  $J$  = 7.5 Hz, 2H), 7.26 (d,  $J$  = 7.5 Hz, 2H), 4.29 (s, 3H), 3.91 (s, 3H).  $^{13}\text{C}$ -NMR ( $\text{D}^6$ -DMSO)  $\delta$  161.4 (C), 161.3 (C), 155.2 (C-H), 139.2 (C), 136.3 (C-H), 130.5 (C-H), 130.4 (C-H), 129.8 (C), 129.6 (C-H), 129.1 (C), 120.3 (C-H), 115.1 (C-H), 97.0 (C-I), 56.0 ( $\text{CH}_3$ ), 45.2

(CH<sub>3</sub>). LRESMS  $m/z$ : C<sub>17</sub>H<sub>15</sub>INO<sup>+</sup> = 376.0 (12, M<sup>+</sup>), 362 (100, M<sup>+</sup> - CH<sub>2</sub>).

HRESMS  $m/z$ : M<sup>+</sup> calculated for C<sub>17</sub>H<sub>15</sub>INO<sup>+</sup>: 376.0193. Found: 376.0191.

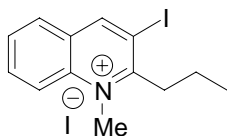

### 3-Iodo-1-methyl-2-propylquinolinium iodide (15b)

Iodine (286 mg, 1.126 mmol) was added to a stirred solution of **10b** (122 mg, 0.562 mmol) in CH<sub>3</sub>CN (3 mL) at room temperature and left to stir. After 0.5 h, the solution was heated to reflux and stirred for a further 10 h. After this time, the solution was cooled to room temperature and concentrated under reduced pressure. The residue was crystallised from ethanol to give the desired product as a yellow solid (175 mg, 71%), mp = 115-116 °C.

<sup>1</sup>H-NMR (CD<sub>3</sub>CN) δ 7.72 (s, 1H), 7.48 (d,  $J$  = 8.7 Hz, 1H), 7.38 – 7.41 (m, 2H), 7.15 (dt,  $J$  = 0.9, 6.9 Hz, 1H), 4.04 (s, 3H), 2.95 (t,  $J$  = 6.6 Hz, 2H), 1.74 (sextet,  $J$  = 6.7 Hz, 2H), 1.00 (t,  $J$  = 6.6 Hz, 3H). <sup>13</sup>C-NMR (CD<sub>3</sub>CN) δ 151.6 (C-H), 139.2 (C), 130.5 (C-H), 130.4 (C-H), 129.8 (C), 129.6 (C-H), 129.1 (C), 120.3 (C-H), 102.3 (C-I), 47.5 (CH<sub>3</sub>), 41.8 (CH<sub>2</sub>), 19.8 (CH<sub>2</sub>), 11.2 (CH<sub>3</sub>). LRESMS  $m/z$ : C<sub>13</sub>H<sub>15</sub>IN<sup>+</sup> = 312.0 (100). HRESMS  $m/z$ : M<sup>+</sup> calculated for C<sub>13</sub>H<sub>15</sub>IN<sup>+</sup>: 312.0244. Found: 312.0241.

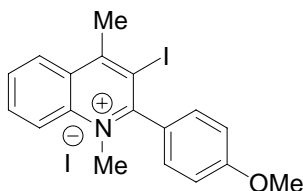

### 1,4-Dimethyl-3-iodo-2-(4-methoxyphenyl)quinolinium iodide (15c)

To a stirred solution of **11a** (55 mg, 0.197 mmol) in THF (4 mL) at -78 °C (dry-ice / acetone bath) was added methyl magnesium chloride (1.5 eq, sol. in THF) dropwise. After stirring for 0.15 h, the solution was warmed to room temperature, quenched with  $\text{NH}_4\text{Cl}_{(\text{aq})}$  (5 mL, 10% in  $\text{H}_2\text{O}$ ), extracted with diethyl ether (2 x 10 mL), washed with water (10 mL), dried over  $\text{Na}_2\text{SO}_4$ , and concentrated under reduced pressure. The resultant oil was diluted with  $\text{CH}_3\text{CN}$  (2 mL) and a solution of iodine (50 mg, 0.197 mmol) in  $\text{CH}_3\text{CN}$  (3 mL) was added. The solution was heated to 65 °C and stirred for 18 h. After this time, the solution was cooled to room temperature, and concentrated under reduced pressure to give a brown residue. The residue was recrystallised from DMF to give the product as red needles (81 mg, 80 %), mp = 152-154 °C.

$^1\text{H}$ -NMR ( $\text{D}^6$ -DMSO)  $\delta$  8.40 (d,  $J$  = 7.8 Hz, 1H), 8.31 (d,  $J$  = 7.2 Hz, 1H), 8.16 (t,  $J$  = 7.2 Hz, 1H), 7.96 (t,  $J$  = 7.8 Hz, 1H), 7.49 (d,  $J$  = 7.5 Hz, 2H), 7.20 (d,  $J$  = 7.5 Hz, 2H), 4.45 (s, 3H), 3.96 (s, 3H), 2.92 (s, 3H).  $^{13}\text{C}$ -NMR ( $\text{D}^6$ -DMSO)  $\delta$  161.2 (C), 161.1 (C), 146.8 (C), 137.6 (C), 135.9 (C-H), 131.0 (C-H), 130.5 (C-H), 129.8 (C), 129.6 (C-H), 129.3 (C), 122.8 (C-H), 114.9 (C-H), 94.5 (C-I), 55.8 ( $\text{CH}_3$ ), 45.0 ( $\text{CH}_3$ ), 14.3 ( $\text{CH}_3$ ). LRESMS  $m/z$ :  $\text{C}_{17}\text{H}_{15}\text{INO}^+$  = 390 (100). HRESMS  $m/z$ :  $\text{M}^+$  calculated for  $\text{C}_{17}\text{H}_{15}\text{INO}^+$ : 390.0349. Found: 390.0352.

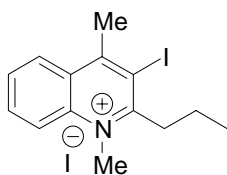

#### 1,4-Dimethyl-3-iodo-2-propylquinolinium iodide (**15d**)

To a stirred solution of **11b** (70 mg, 0.326 mmol) in THF (4 mL) at -78 °C (dry-ice / acetone bath) was added methyl magnesium chloride (0.325 mL, 0.488 mmol) dropwise. After stirring for 0.15 h, the solution was warmed to room temperature, quenched with  $\text{NH}_4\text{Cl}_{(\text{aq})}$  (5 mL, 10% in  $\text{H}_2\text{O}$ ), extracted with diethyl ether (2 x 10 mL), washed with water (10 mL), dried over  $\text{Na}_2\text{SO}_4$ , and concentrated under reduced



pressure. The resultant oil was diluted with CH<sub>3</sub>CN (3 mL) and a solution of iodine (165 mg, 0.652 mmol) in CH<sub>3</sub>CN (3 mL) was added at room temperature and left to stir. After 0.5 h, the solution was heated to reflux and stirred for a further 16 h. After this time, the solution was cooled to room temperature and concentrated under reduced pressure. The residue was crystallised from ethanol to give the desired product as a dark red solid (109 mg, 74%), mp = 120-122 °C.

<sup>1</sup>H-NMR (CD<sub>3</sub>CN) δ 7.67 (d, *J* = 7.6 Hz, 1H), 7.41 – 7.53 (m, 2H), 7.03 (dt, *J* = 1.0, 7.4 Hz, 1H), 4.19 (s, 3H), 3.01 (s, 3H), 2.82 (t, *J* = 6.7 Hz, 2H), 1.72 (sextet, *J* = 6.7 Hz, 2H), 1.01 (t, *J* = 6.6 Hz, 3H). <sup>13</sup>C-NMR (CD<sub>3</sub>CN) δ 148.7 (C), 138.9 (C), 130.6 (C-H), 130.4 (C-H), 129.3 (C), 129.2 (C-H), 128.9 (C), 120.3 (C-H), 104.5 (C-I), 48.2 (CH<sub>3</sub>), 41.7 (CH<sub>2</sub>), 19.4 (CH<sub>2</sub>), 19.5 (CH<sub>3</sub>), 11.2 (CH<sub>3</sub>). LRESMS *m/z*: C<sub>14</sub>H<sub>17</sub>IN<sup>+</sup> = 326.0 (100). HRESMS *m/z*: M<sup>+</sup> calculated for C<sub>14</sub>H<sub>17</sub>IN<sup>+</sup>: 326.0406. Found: 326.0402.

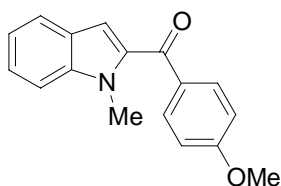

#### 2-(4-Methoxybenzoyl)-1-methylindole (17a)

A solution of iodine (109, 0.429 mmol) in ethanol (3 mL) was added to a stirred solution of **10a** (120 mg, 0.427 mmol) in ethanol (3 mL), and stirred for 0.5 h. After this time, the solution was heated to 65 °C and stirred for 6 h. After this time, the solution was cooled to room temperature, diluted with Na<sub>2</sub>S<sub>2</sub>O<sub>5(aq)</sub> (10 mL, sat.), extracted with ethyl acetate (2 x 20 mL), dried over MgSO<sub>4</sub>, and concentrated under reduced pressure onto silica gel (2 g). The residue was subjected to flash chromatography (silica gel, eluent: ethyl acetate, hexanes 1:99, 1:19) to give the product as a white solid (88 mg, 78 %), mp = 82-84 °C.

$^1\text{H-NMR}$  ( $\text{CDCl}_3$ )  $\delta$  7.98 (d,  $J = 8.7$  Hz, 2H), 7.70 (d,  $J = 8.0$  Hz, 1H), 7.45 (d,  $J = 8.0$  Hz, 1H), 7.41 (dt,  $J = 1.5, 6.5$  Hz, 1H), 7.18 (dt,  $J = 1.5, 6.5$  Hz, 1H), 7.00 (d,  $J = 8.7$  Hz, 2H), 7.00 (s, 1H), 4.09 (s, 3H), 3.91 (s, 3H).  $^{13}\text{C-NMR}$  ( $\text{CDCl}_3$ )  $\delta$  187.2 (C), 163.1 (C), 140.0 (C), 135.2 (C), 132.1 (C-H), 131.9 (C), 125.8 (C), 125.5 (C-H), 122.7 (C-H), 120.6 (C-H), 113.5 (C-H), 113.4 (C-H), 110.2 (C-H), 55.5 ( $\text{CH}_3$ ), 31.8 ( $\text{CH}_3$ ). LRESMS  $m/z$ : 265.1 (100). HRESMS  $m/z$ :  $\text{M}^+$  calculated for  $\text{C}_{17}\text{H}_{16}\text{NO}_2^+$ : 266.1176. Found: 266.1176.

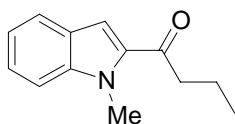

### 2-(1-Butanoyl)-1-methylindole (17b)

Iodine (176 mg, 0.693 mmol) in ethanol (5 mL) was added dropwise to a stirred solution of **10b** (150 mg, 0.691 mmol) in ethanol (5 mL, 95%) and the solution was then refluxed for 6 h, cooled and concentrated to remove the ethanol. The resultant crude was diluted with ethyl acetate (10 mL), quenched with  $\text{Na}_2\text{S}_2\text{O}_5(\text{aq})$  (15 mL, 10 % sol.), dried over  $\text{Na}_2\text{SO}_4$ , and concentrated under reduced pressure onto silica gel (2 g). The residue was subjected to flash chromatography (silica gel, eluent: diethyl ether, hexanes 1:19, then 1:9) to give the desired product as a cream solid (94 mg, 68 %), mp = 78-80 °C.

$^1\text{H-NMR}$  (300 MHz,  $\text{CDCl}_3$ )  $\delta$  7.70 (d,  $J = 8.1$  Hz, 1H), 7.38 – 7.40 (m, 2H), 7.30 (s, 1H), 7.14 – 7.19 (m, 2H), 4.09 (s, 3H), 2.96 (t,  $J = 7.2$  Hz, 2H), 1.82 (sextet,  $J = 7.5$  Hz, 2H), 1.04 (t,  $J = 7.5$  Hz, 3H).  $^{13}\text{C-NMR}$  ( $\text{CDCl}_3$ )  $\delta$  194.5 (C), 140.0 (C), 134.9 (C), 125.8 (C), 125.7 (C-H), 122.8 (C-H), 120.6 (C-H), 111.0 (C-H), 110.3 (C-H), 41.8 ( $\text{CH}_2$ ), 32.1 ( $\text{CH}_3$ ), 18.6 ( $\text{CH}_2$ ), 13.9 ( $\text{CH}_3$ ). LRESMS  $m/z$ :  $\text{C}_{13}\text{H}_{16}\text{NO}^+ = 202.0$  (40). HRESMS  $m/z$ :  $\text{M}^+$  calculated for  $\text{C}_{13}\text{H}_{16}\text{NO}^+$ : 202.1226. Found: 202.1226.

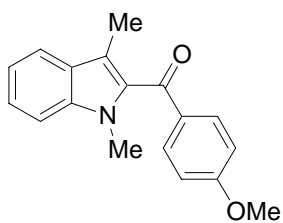

**1,3-Dimethyl-2-(4-methoxybenzoyl)indole (17c)**

To a stirred solution of **11a** (50 mg, 0.179 mmol) in THF (4 mL) at -78 °C (dry-ice / acetone bath) was added methyl magnesium chloride (1.5 eq, sol. in THF) dropwise. After stirring for 0.15 h, the solution was warmed to room temperature, quenched with  $\text{NH}_4\text{Cl}_{(\text{aq})}$  (5 mL, 10% in  $\text{H}_2\text{O}$ ), extracted with diethyl ether (2 x 10 mL), washed with water (10 mL), dried over  $\text{Na}_2\text{SO}_4$ , and concentrated under reduced pressure. The resultant oil was diluted with ethanol (5 mL, 95%) and a solution of iodine (45 mg, 0.179 mmol) in ethanol (3 mL) was added. The solution was then refluxed for 18 h, cooled and concentrated to remove the ethanol. The resultant crude was diluted with ethyl acetate (10 mL), quenched with  $\text{Na}_2\text{S}_2\text{O}_{5(\text{aq})}$  (10 mL, 10 % sol.), dried over  $\text{Na}_2\text{SO}_4$ , and concentrated under reduced pressure onto silica gel (1 g). The residue was subjected to flash chromatography (silica gel, eluent: ethyl acetate, hexanes 1:49, 1:19, then 1:9) to give the desired product as a yellow solid (36 mg, 72 %), mp = 88 - 90 °C.

$^1\text{H-NMR}$  ( $\text{CDCl}_3$ )  $\delta$  7.87 (d,  $J$  = 8.7 Hz, 2H), 7.65 (d,  $J$  = 7.8 Hz, 1H), 7.35 – 7.41 (m, 2H), 7.17 (t,  $J$  = 7.8, 1H), 6.98 (d,  $J$  = 8.7 Hz, 2H), 3.91 (s, 3H), 3.82 (s, 3H), 2.18 (s, 3H).  $^{13}\text{C-NMR}$  ( $\text{CDCl}_3$ )  $\delta$  188.9 (C), 163.5 (C), 138.7 (C), 134.0 (C), 132.4 (C), 132.2 (C-H), 127.5 (C), 124.8 (C-H), 120.5 (C-H), 119.7 (C-H), 117.1 (C), 113.8 (C-H), 109.8 (C-H), 55.4 ( $\text{CH}_3$ ), 31.4 ( $\text{CH}_3$ ), 10.8 ( $\text{CH}_3$ ). LRESMS  $m/z$ :  $\text{C}_{18}\text{H}_{18}\text{NO}_2^+$  = 280.1 (100). HRESMS  $m/z$ :  $\text{M}^+$  calculated for  $\text{C}_{18}\text{H}_{18}\text{NO}_2^+$ : 280.1332. Found: 280.1332.

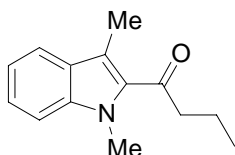

**2-(1-Butanoyl)-1,3-dimethylindole (17d)**

To a stirred solution of **11b** (125 mg, 0.582 mmol) in THF (5 mL) at -78 °C (dry-ice / acetone) bath was added a solution of methyl magnesium bromide (0.30 mL in THF, 0.900 mmol). After 0.25 h, the solution was warmed to room temperature and quenched with  $\text{NH}_4\text{Cl}_{(\text{aq})}$  (10 mL, 10 % in  $\text{H}_2\text{O}$ ), extracted with diethyl ether (3 x 10 mL), dried over  $\text{MgSO}_4$  and concentrated under reduced pressure. The residue was taken up in ethanol (5 mL), and a solution of iodine (148 mg, 0.582 mmol) in ethanol (3 mL) was added dropwise. The solution was heated to reflux and left to stir for 6 h. After this time, the solution was cooled to room temperature and concentrated under reduced pressure to remove the greater part of solvent. The residue was quenched with  $\text{Na}_2\text{S}_2\text{O}_5_{(\text{aq})}$  (10 mL, sat.) and extracted with diethyl ether (3 x 10 mL), dried over  $\text{MgSO}_4$  and concentrated under reduced pressure onto silica gel (2 g). The residue was subjected to flash chromatography (silica gel, eluent ) to give the desired product as a white solid (115 mg, 92 %), mp = 86-88 °C.

$^1\text{H}$ -NMR (300 MHz,  $\text{CDCl}_3$ )  $\delta$  7.70 (d,  $J$  = 8.1 Hz, 1H), 7.33 – 7.42 (m, 2H), 7.16 (t,  $J$  = 1.5, 7.8 Hz, 1H), 3.97 (s, 3H), 2.94 (t,  $J$  = 7.2 Hz, 2H), 2.65 (s, 3H), 1.84 (sextet,  $J$  = 7.5 Hz, 2H), 1.06 (t,  $J$  = 7.5 Hz, 3H).  $^{13}\text{C}$ -NMR ( $\text{CDCl}_3$ )  $\delta$  195.6 (C), 138.8 (C), 133.8 (C), 127.2 (C), 125.6 (C-H), 120.7 (C-H), 119.7 (C-H), 118.1 (C), 110.0 (C-H), 45.0 ( $\text{CH}_2$ ), 32.5 ( $\text{CH}_3$ ), 17.9 ( $\text{CH}_2$ ), 13.9 ( $\text{CH}_3$ ), 11.7 ( $\text{CH}_3$ ). LRESMS  $m/z$ :

$\text{C}_{14}\text{H}_{18}\text{NO}^+ = 216.1$  (100). HRESMS  $m/z$ :  $\text{M}^+$  calculated for  $\text{C}_{14}\text{H}_{18}\text{NO}^+$ : 216.1383.

Found: 216.1381.

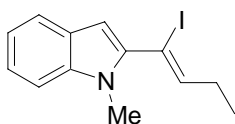

## 2-[(Z)-1-Iodobut-1-enyl]-1-methylindole (24a)

*n*-Butyllithium (1.30 mL, 2.00 mmol) was added dropwise to a solution of pentyne (160 mg, 2.35 mmol) in THF (5 mL) at 0 °C (ice-bath) and stirred for 0.15 h. After this time a solution of **9** (260 mg, 1.75 mmol) in THF (2 mL) was added and the solution warmed to room temperature. After stirring for 0.15 h, acetic anhydride (250 mg, 2.45 mmol) was added and the solution left to stir for a further 0.5 h. After this time the solution was quenched with NH<sub>4</sub>Cl<sub>(aq)</sub> (6 mL, 10 %) and extracted with diethyl ether (3 x 10 mL), dried over MgSO<sub>4</sub>, and concentrated under reduced pressure to give a yellow resin. This residue was diluted with ethanol (15 mL), and a solution of iodine (443 mg, 1.75 mmol) in ethanol (6 mL) was added dropwise. After stirring for 0.1 h, the ethanol was removed under reduced pressure, taking care not to heat above 25 °C. The resultant brown residue was dried on a freeze-dryer pump for 48 h to remove any water, and then diluted with anhydrous dichloroethane (4 mL). The solution was heated to 65 °C and stirred for 2 h, then cooled to room temperature, quenched with Na<sub>2</sub>S<sub>2</sub>O<sub>5(aq)</sub> (10 mL, 10 %), extracted with CH<sub>2</sub>Cl<sub>2</sub> (2 x 10 mL), dried over MgSO<sub>4</sub> and concentrated under reduced pressure onto silica gel (3 g). The residue was subjected to flash chromatography (silica gel, eluent: diethyl ether, hexanes 1:99, then 1:19) to give the desired product as an off-white solid (326 mg, 60 %), mp = 101-102 °C (this product underwent some *cis/trans*-isomerisation in CDCl<sub>3</sub>).

<sup>1</sup>H-NMR (CD<sub>3</sub>CN) δ 7.54 (d, *J* = 7.8 Hz, 1H), 7.37 (d, *J* = 7.8 Hz, 1H), 7.23 (dt, *J* = 1.1, 7.8 Hz, 1H), 7.09 (dt, *J* = 1.1, 7.8 Hz, 1H), 6.44 (s, 1H), 5.99 (t, *J* = 6.9 Hz, 1H), 2.35 (m, *J* = 7.5 Hz, 2H), 1.13 (t, *J* = 7.5, 3H). <sup>13</sup>C-NMR (CD<sub>3</sub>CN) δ 145.7 (C-H), 141.9 (C), 137.6 (C), 126.9 (C), 122.3 (C-H), 120.6 (C-H), 119.8 (C-H), 109.7 (C-H), 101.9 (C-H), 89.7 (C-I), 30.4 (CH<sub>3</sub>), 30.3 (CH<sub>2</sub>), 11.8 (CH<sub>3</sub>). LRESMS *m/z*:

C<sub>13</sub>H<sub>15</sub>NI<sup>+</sup> = 312.1 (100). HRESMS *m/z*: M<sup>+</sup> calculated for C<sub>13</sub>H<sub>15</sub>NI<sup>+</sup>: 312.0244.

Found: 312.0241.

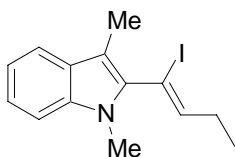

**1,3-Dimethyl-2-[(Z)-1-Iodobut-1-enyl]indole (24b)**

To a stirred solution of **11b** (54 mg, 0.251 mmol) in THF (5 mL) at -78 °C (dry-ice / acetone) bath was added a solution of methyl magnesium bromide (0.14 mL in THF, 0.420 mmol). After stirring for 0.15 h, acetic anhydride (85 mg, 0.83 mmol) was added and the solution left to stir for a further 0.5 h. After this time the solution was quenched with  $\text{NH}_4\text{Cl}_{(\text{aq})}$  (5 mL, 10 %) and extracted with diethyl ether (3 x 10 mL), dried over  $\text{MgSO}_4$ , and concentrated under reduced pressure to give a pale yellow resin. This residue was diluted with ethanol (3 mL), and a solution of iodine (64 mg, 0.252 mmol) in ethanol (2 mL) was added dropwise. After stirring for 0.1 h, the ethanol was removed under reduced pressure, taking care not to heat above 25 °C. The resultant brown residue was dried on a freeze-dryer pump for 36 h to remove any water, and then diluted with anhydrous dichloroethane (4 mL). The solution was heated to 65 °C and stirred for 1 h, then cooled to room temperature, quenched with  $\text{Na}_2\text{S}_2\text{O}_5_{(\text{aq})}$  (5 mL, 10 %), extracted with  $\text{CH}_2\text{Cl}_2$  (2 x 10 mL), dried over  $\text{MgSO}_4$  and concentrated under reduced pressure onto silica gel (1 g). The residue was subjected to flash chromatography (silica gel, eluent: diethyl ether, hexanes 1:99, then 1:19) to give the desired product as a white solid (51 mg, 63 %), mp = 108-110 °C.

$^1\text{H-NMR}$  ( $\text{CD}_3\text{CN}$ )  $\delta$  7.65 (d,  $J$  = 7.7 Hz, 1H), 7.41 (d,  $J$  = 7.7 Hz, 1H), 7.19 (dt,  $J$  = 1.1, 7.8 Hz, 1H), 7.04 (dt,  $J$  = 1.1, 7.8 Hz, 1H), 6.12 (t,  $J$  = 6.7 Hz, 1H), 3.56 (s, 3H), 2.40 (s, 3H), 2.33 (m,  $J$  = 7.5 Hz, 2H), 1.12 (t,  $J$  = 7.5, 3H).  $^{13}\text{C-NMR}$  ( $\text{CD}_3\text{CN}$ )  $\delta$  141.2 (C), 138.6 (C), 136.9 (C), 126.8 (C), 122.3 (C-H), 119.1 (C-H), 116.5 (C-H), 110.0 (C-H), 101.9 (C-H), 89.8 (C-I), 31.2 ( $\text{CH}_3$ ), 30.2 ( $\text{CH}_2$ ), 12.9 ( $\text{CH}_3$ ), 11.6 ( $\text{CH}_3$ ). LRESMS  $m/z$ :  $\text{C}_{14}\text{H}_{17}\text{NI}^+$  = 326.0 (100). HRESMS  $m/z$ :  $\text{M}^+$  calculated for  $\text{C}_{13}\text{H}_{15}\text{NI}^+$ : 326.0400. Found: 326.0397.

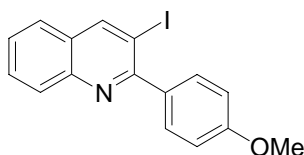

### 3-Iodo-2-(4-methoxyphenyl)quinoline

Triphenylphosphine (86 mg, 0.328 mmol) and **15a** (93 mg, 0.185 mmol) were diluted in sulfolane (1.26 mL), and heated to 150 °C for 0.5 h, and then recooled to room temperature. After this time, the solution was quenched with water (5 mL) and extracted with ethyl acetate (2 x 5 mL), dried over MgSO<sub>4</sub>, and concentrated under reduced pressure onto silica gel. The residue was subjected to a small silica gel plug, washed with eluent (5 % diethyl ether in hexanes, then 20 % diethyl ether in hexanes) to substantially remove the triphenylphosphine and sulfolane, and the collected solution was concentrated under reduced pressure onto silica gel. The residue was subjected to flash chromatography (silica gel, eluent ethyl acetate : hexanes, 1 : 4) to give the desired product as a yellow solid (51 mg, 77 %), mp = 108-110 °C.

<sup>1</sup>H-NMR (CDCl<sub>3</sub>) δ 8.90 (s, 1H), 8.39 (d, *J* = 8.1 Hz, 1H), 7.78 – 7.83 (m, 2H), 7.70 (d, *J* = 8.7 Hz, 2H), 7.61 (dt, *J* = 1.5, 8.4 Hz, 1H), 7.04 (d, *J* = 8.1 Hz, 2H), 3.90 (s, 3H). <sup>13</sup>C-NMR (CDCl<sub>3</sub>) δ 160.2 (C), 160.0 (C), 147.1 (C-H), 146.9 (C), 134.6 (C), 130.8 (C-H), 130.1 (C-H), 129.3 (C-H), 128.3 (C), 127.0 (C-H), 126.2 (C-H), 113.3 (C-H), 91.4 (C-I), 55.3 (CH<sub>3</sub>). LRESMS *m/z*: C<sub>16</sub>H<sub>13</sub>NIO<sup>+</sup> = 362.1 (100). HRESMS *m/z*: M<sup>+</sup> calculated for C<sub>16</sub>H<sub>13</sub>INO<sup>+</sup> = 362.0036. Found = 362.0032.

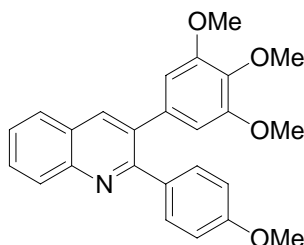

### 2-(4-Methoxyphenyl)-3-(3,4,5-trimethoxyphenyl)quinoline (25)

A solution of  $\text{Na}_2\text{CO}_3$  (205 mg, 1.93 mmol) in  $\text{H}_2\text{O}$  (1 mL) was added to a solution of 3-Iodo-2-(4-methoxyphenyl)quinoline (80 mg, 0.222 mmol), 3,4,5-trimethoxybenzene boronic acid (142 mg, 0.670 mmol),  $\text{Pd}(\text{dba})_2$  (3.3 mg, 5.7  $\mu\text{mol}$ ), and triphenylphosphine (7.0 mg, 26.7  $\mu\text{mol}$ ) in DMF (4 mL). The solution was degassed by exposure to vacuum and backfilling with  $\text{N}_{2(\text{g})}$  (3 cycles) to remove dissolved oxygen. The solution was then heated to 120  $^\circ\text{C}$ , and left to stir for 10 h. After cooling to room temperature the reaction mixture was diluted with HCl (0.05 M in  $\text{H}_2\text{O}$ , 20 mL), and extracted with ethyl acetate (3 x 30 mL), dried over  $\text{Na}_2\text{SO}_4$ , and concentrated onto silica gel (4 g). The residue was subjected to flash chromatography (silica gel, eluent: ethyl acetate, hexanes 1:9, 1:4, then 1:1) to give the product as a yellow solid (72 mg, 81 %), mp = 138-142  $^\circ\text{C}$ .

$^1\text{H}$ -NMR ( $\text{CDCl}_3$ )  $\delta$  8.16 – 8.19 (m, 2H), 7.85 (dd,  $J$  = 1.2, 7.5 Hz, 1H), 7.72 (dt,  $J$  = 1.2, 7.5 Hz, 1H), 7.55 (dt,  $J$  = 1.2, 7.5 Hz, 1H), 7.42 (d,  $J$  = 8.7 Hz, 2H), 6.84 (d,  $J$  = 8.7 Hz, 2H), 6.47 (s, 2H), 3.88 (s, 3H), 3.81 (s, 3H), 3.70 (s, 6H).  $^{13}\text{C}$ -NMR ( $\text{CDCl}_3$ )  $\delta$  159.6 (C), 157.9 (C), 152.9 (C), 147.3 (C), 136.8 (C-H), 135.4 (C), 134.2 (C), 133.0 (C), 131.1 (C-H), 129.4 (C-H), 129.3 (C-H), 127.3 (C-H), 126.9 (C), 126.5 (C-H), 113.4 (C-H), 107.2 (C-H), 60.9 ( $\text{CH}_3$ ), 56.2, ( $\text{CH}_3$ ), 56.0 ( $\text{CH}_3$ ). LRESMS  $m/z$ :  $\text{C}_{25}\text{H}_{24}\text{NO}_4^+ = 402.3$  (100). HRESMS  $m/z$ :  $\text{M}^+$  calculated for  $\text{C}_{25}\text{H}_{24}\text{NO}_4^+$ : 402.1700. Found: 402.1695.

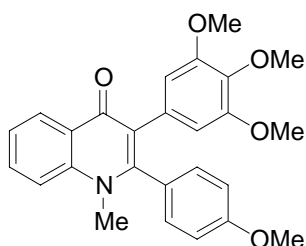

**2-(4-Methoxyphenyl)-1-methyl-3-(3,4,5-trimethoxyphenyl)quinolin-4-one (26)**

A solution of  $\text{Na}_2\text{CO}_3$  (213 mg, 2.01 mmol) in  $\text{H}_2\text{O}$  (1 mL) was added to a solution of **KH-3-69** (168 mg, 0.448 mmol), 3,4,5-trimethoxybenzene boronic acid (142 mg, 0.670 mmol), DBA (7.7 mg, 13.4  $\mu\text{mol}$ ), and triphenylphosphine (14.1 mg, 53.8



$\mu\text{mol}$ ) in DMF (4 mL). The solution was degassed by exposure to vacuum and backfilling with  $\text{N}_{2(g)}$  (3 cycles) to remove dissolved oxygen. The solution was then heated to  $110\text{ }^{\circ}\text{C}$ , and left to stir for 8 h. After cooling to room temperature the reaction mixture was diluted with HCl (0.05 M in  $\text{H}_2\text{O}$ , 20 mL), and extracted with ethyl acetate (3 x 30 mL), dried over  $\text{Na}_2\text{SO}_4$ , and concentrated onto silica gel (3 g). The residue was subjected to flash chromatography (silica gel, eluent: ethyl acetate, DCM, hexanes 3:1:4, 3:1:2, then 3:1:0) to give the product as a yellow solid (160 mg, 83 %), mp =  $192\text{-}194\text{ }^{\circ}\text{C}$ .

$^1\text{H-NMR}$  (300 MHz,  $\text{CDCl}_3$ )  $\delta$  8.57 (dd,  $J = 1.5, 7.8\text{ Hz}$ , 1H), 7.73 (dt,  $J = 1.5, 7.5\text{ Hz}$ , 1H), 7.57 (d,  $J = 8.4\text{ Hz}$ , 1H), 7.42 (t,  $J = 7.5\text{ Hz}$ , 1H), 7.08 (d,  $J = 8.7\text{ Hz}$ , 2H), 6.81 (d,  $J = 8.7\text{ Hz}$ , 2H), 6.27 (s, 2H), 3.77 (s, 3H), 3.76 (s, 3H), 3.65 (s, 6H), 3.58 (s, 3H).  $^{13}\text{C-NMR}$  ( $\text{CDCl}_3$ )  $\delta$  175.9 (C), 159.7 (C), 152.2 (C), 141.3 (C), 136.2 (C), 132.2 (C-H), 131.3 (C), 130.8 (C-H), 127.2 (C), 127.1 (C-H), 126.4 (C), 124.1 (C), 123.5 (C-H), 115.8 (C-H), 113.7 (C-H), 109.0 (C-H), 60.6 ( $\text{CH}_3$ ), 55.8 ( $\text{CH}_3$ ), 55.2 ( $\text{CH}_3$ ), 37.7 ( $\text{CH}_3$ ). LRESMS  $m/z$ :  $\text{C}_{26}\text{H}_{26}\text{NO}_5^+ = 432.3$  (100). HRESMS  $m/z$ :  $\text{M}^+$  calculated for  $\text{C}_{26}\text{H}_{26}\text{NO}_5^+$ : 432.1806. Found: 432.1803.

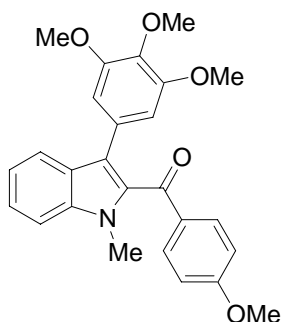

**2-(4-Methoxybenzoyl)-1-methyl-3-(3,4,5-trimethoxyphenyl)indole (27)**

*t*-Butyllithium (0.65 mL, 0.824 mmol) was added dropwise to a solution of 3,4,5-trimethoxy iodobenzene (117 mg, 0.400 mmol) in THF (3 mL) at  $-78\text{ }^{\circ}\text{C}$  (dry-ice / acetone bath) and stirred for 0.25 h. After this time, the solution was warmed to room temperature, and then re-cooled to  $-78\text{ }^{\circ}\text{C}$ . A solution of **11a** (85 mg, 0.305 mmol) in THF (2 mL) was added dropwise, and the solution left to stir for a further 0.1 h, and

then warmed to room temperature. The solution was then quenched with  $\text{NH}_4\text{Cl}_{(\text{aq})}$  (5 mL, sat.), extracted with ethyl acetate (2 x 10 mL), dried over  $\text{Na}_2\text{SO}_4$ , and concentrated under reduced pressure to give an orange residue. The residue was diluted with ethanol (8 mL, 95 %), and a solution of iodine (78 mg, 0.307 mmol) in ethanol (2 mL) was added dropwise. After stirring at room temperature for 1 h, water (1 mL) was added and the solution was heated to 65 °C and left to stir. After 10 h, the solution was cooled to room temperature and concentrated under reduced pressure to remove the greater part of solvent. The residue was quenched with  $\text{Na}_2\text{S}_2\text{O}_{5(\text{aq})}$  (10 mL, sat.), extracted with ethyl acetate (2 x 10 mL), dried over  $\text{Na}_2\text{SO}_4$ , and concentrated under reduced pressure onto silica gel (2 g). The residue was subjected to flash chromatography (silica gel, eluent ethyl acetate, dichloromethane, hexanes 1:2:17, 1:1:8, then 2:1:7) to give the product as a yellow solid (84 mg, 63 %), mp = 146-148 °C.

$^1\text{H}$ -NMR ( $\text{CDCl}_3$ )  $\delta$  7.84 (d,  $J$  = 8.1 Hz, 1H), 7.71 (d,  $J$  = 8.7 Hz, 2H), 7.40 – 7.49 (m, 2H), 7.24 (dt,  $J$  = 1.5, 6.6 Hz, 1H), 6.67 (d,  $J$  = 8.7 Hz, 2H), 6.53 (s, 2H), 3.92 (s, 3H), 3.77 (s, 6H), 3.73 (s, 6H).  $^{13}\text{C}$ -NMR ( $\text{CDCl}_3$ )  $\delta$  187.5 (C), 165.2 (C), 159.4 (C), 156.8 (C), 146.8 (C), 136.2 (C), 134.4 (C), 132.1 (C), 131.6 (C-H), 131.3 (C-H), 127.0 (C), 125.1 (C-H), 120.4 (C-H), 119.7 (C-H), 117.0 (C), 112.2 (C-H), 109.7 (C-H), 60.5 ( $\text{CH}_3$ ), 56.1 ( $\text{CH}_3$ ), 55.4 ( $\text{CH}_3$ ), 31.4 ( $\text{CH}_3$ ). LRESMS  $m/z$ :  $\text{C}_{26}\text{H}_{26}\text{NO}_5^+$  = 432.2 (100). HRESMS  $m/z$ :  $\text{M}^+$  calculated for  $\text{C}_{26}\text{H}_{26}\text{NO}_5^+$ : 432.1805. Found: 432.1807.

## Cyclisation in ethanol: Initial Product

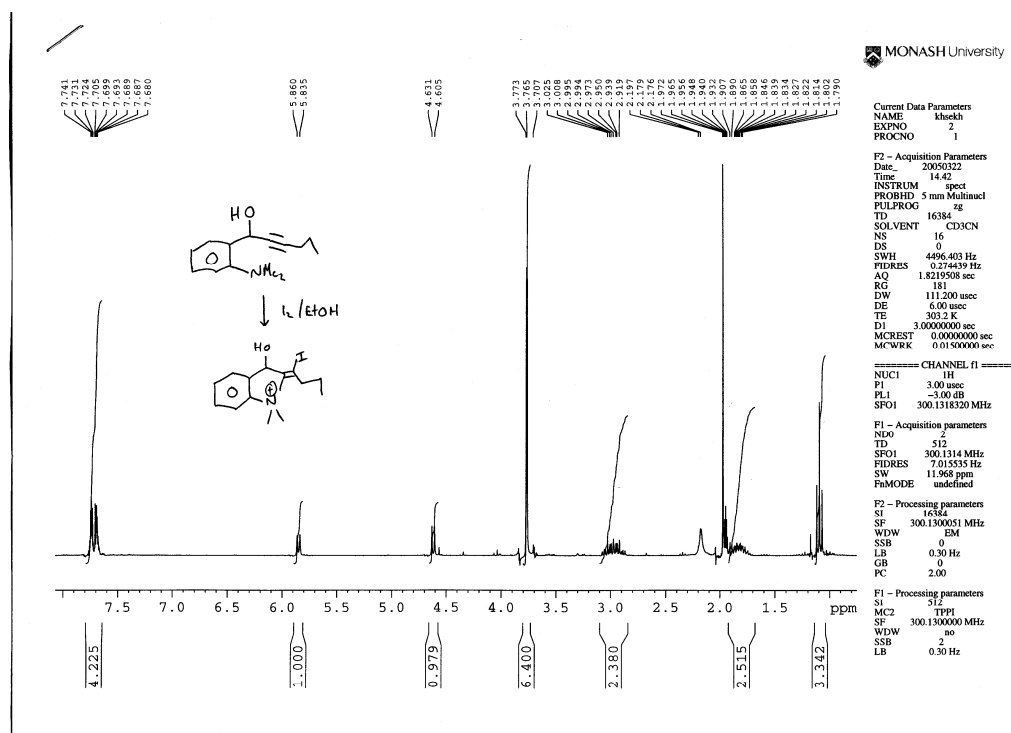

## Cyclisation in ethanol: Product after heating in acetonitrile

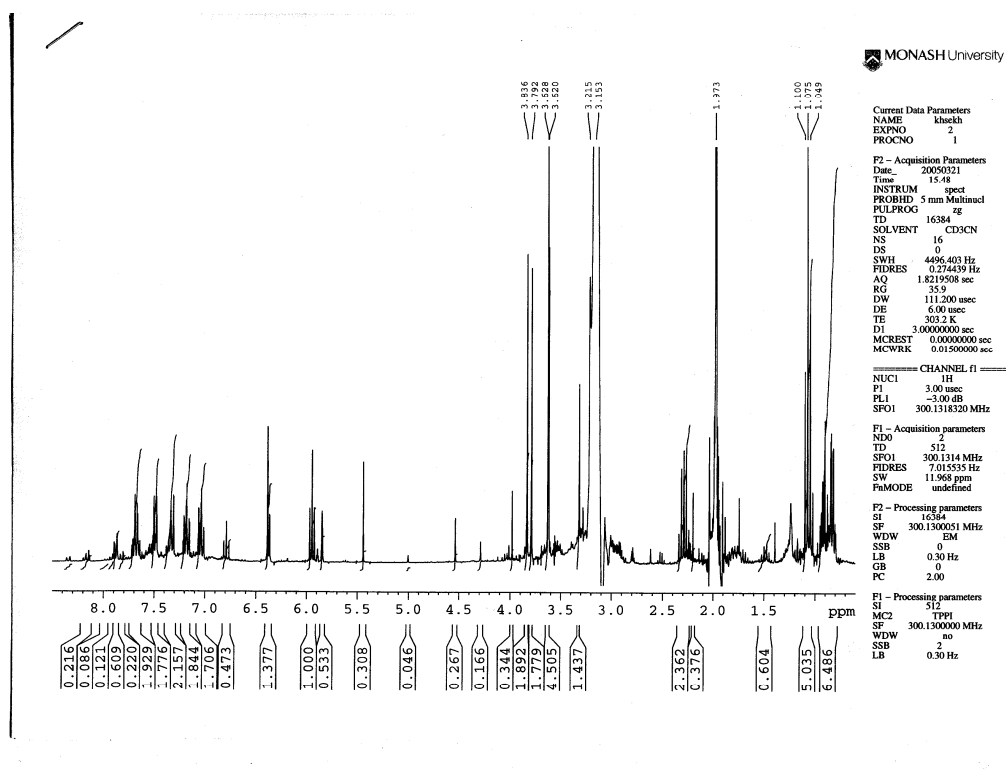



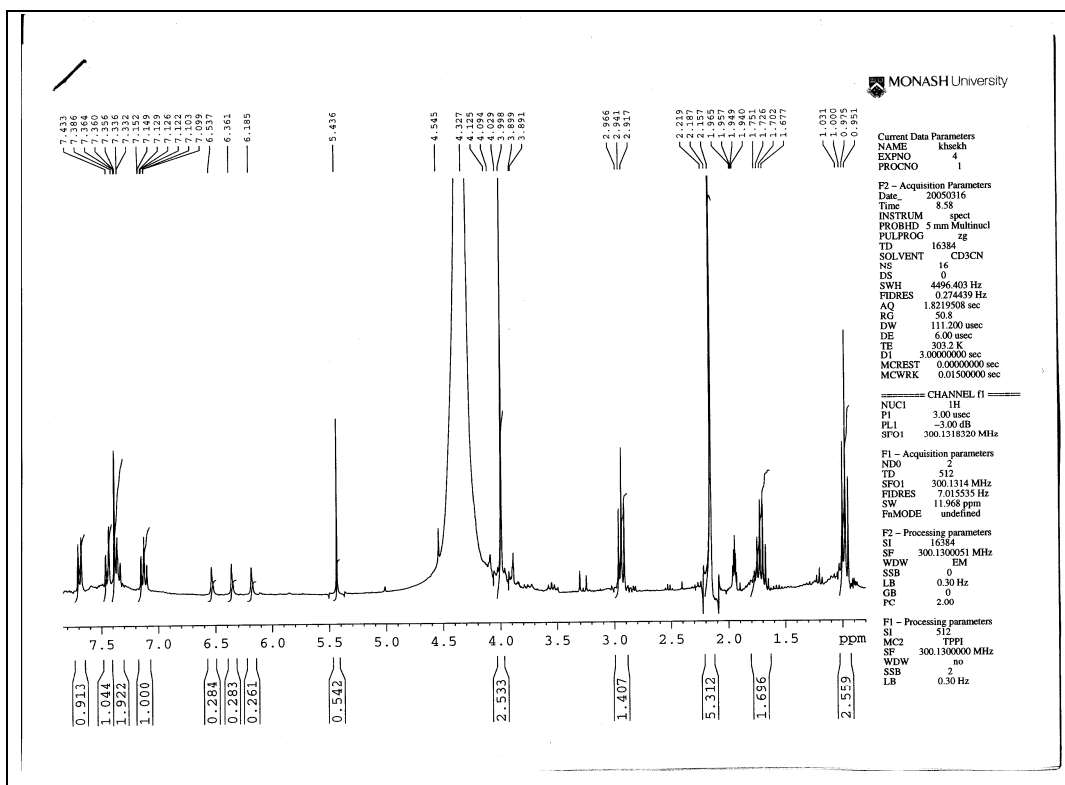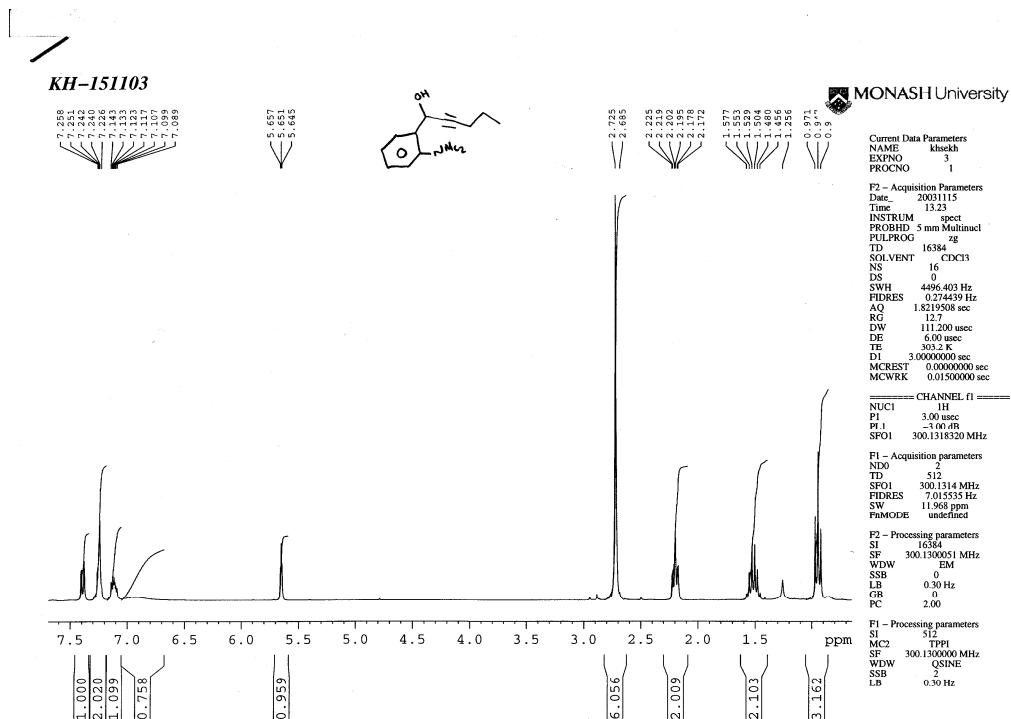

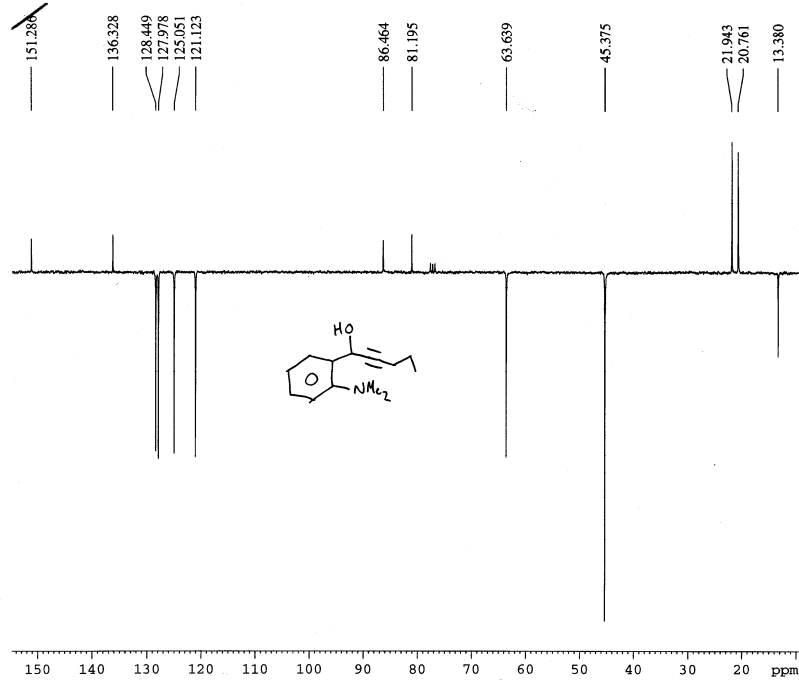

**KH-3-71-a**

Current Data Parameters  
NAME khuekh  
EXPNO 2  
PROCNO 1

F2 - Acquisition Parameters  
Date\_ 20050307  
Time 13.42  
INSTRUM spect  
PROBHD 5 mm Multinuc1  
PULPROG jmod  
TD 32768  
SOLVENT CDCl3  
NS 86  
DS 4  
SWH 20329.203 Hz  
FIDRES 0.620276 Hz  
AQ 0.8061428 sec  
RG 1024.6  
DW 24.600 usec  
DE 20.00 usec  
TE 303.2 K  
CNST2 145.000000  
CNST11 1.000000  
D1 4.0000000 sec  
G20 0.00689655 sec  
DETA 0.00001426 sec  
MCREST 0.00000000 sec  
MCWRK 0.01500000 sec

\*\*\*\*\* CHANNEL f1 \*\*\*\*\*  
NUC1 13C  
P1 11.20 usec  
P2 22.40 usec  
PL1 0.00 dB  
SFO1 75.4767190 MHz

\*\*\*\*\* CHANNEL f2 \*\*\*\*\*  
CPDPRG2 waltz16  
NUC2 1H  
PCPD2 100.00 usec  
PL2 -3.00 dB  
PL12 19.40 dB  
SFO2 300.1320000 MHz

F1 - Acquisition parameters  
ND0 2  
TD 512  
SFO1 300.1314 MHz  
FIDRES 7.015555 Hz  
SW 11.968 ppm  
FMODE undefined

F2 - Processing parameters  
SI 32768  
SF 75.4677556 MHz  
WDW EM  
SSB 0  
LB 3.00 Hz  
GB 0  
PC 1.00

F1 - Processing parameters

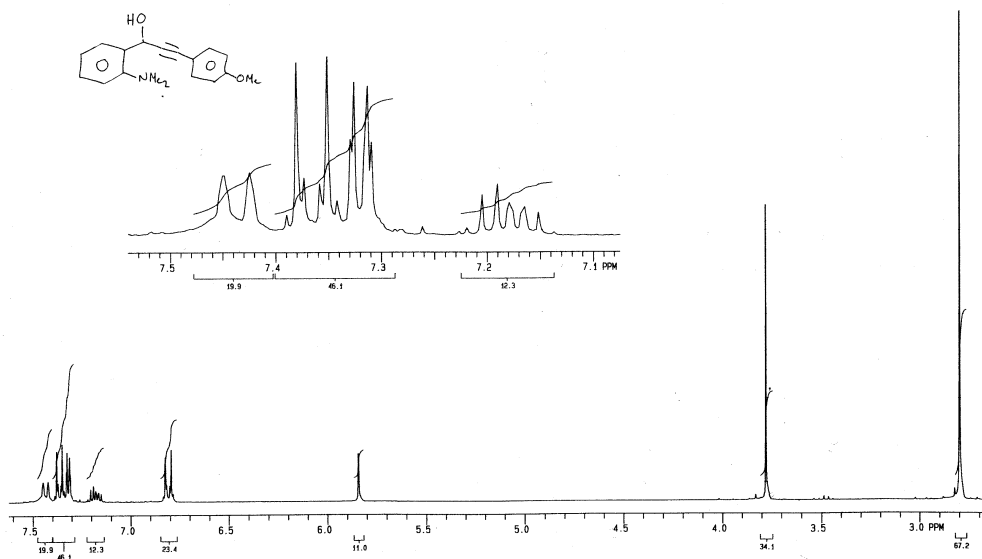

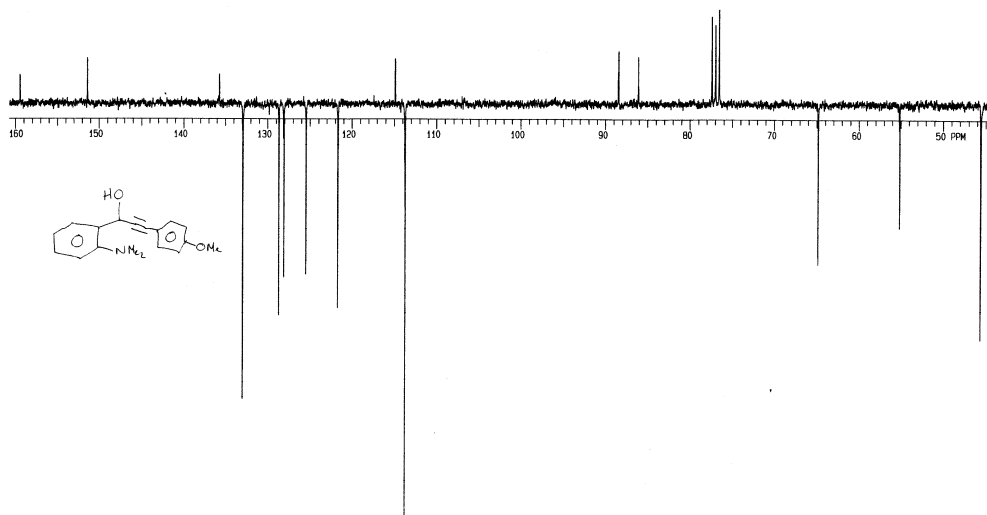

KH-3-71: low Rf

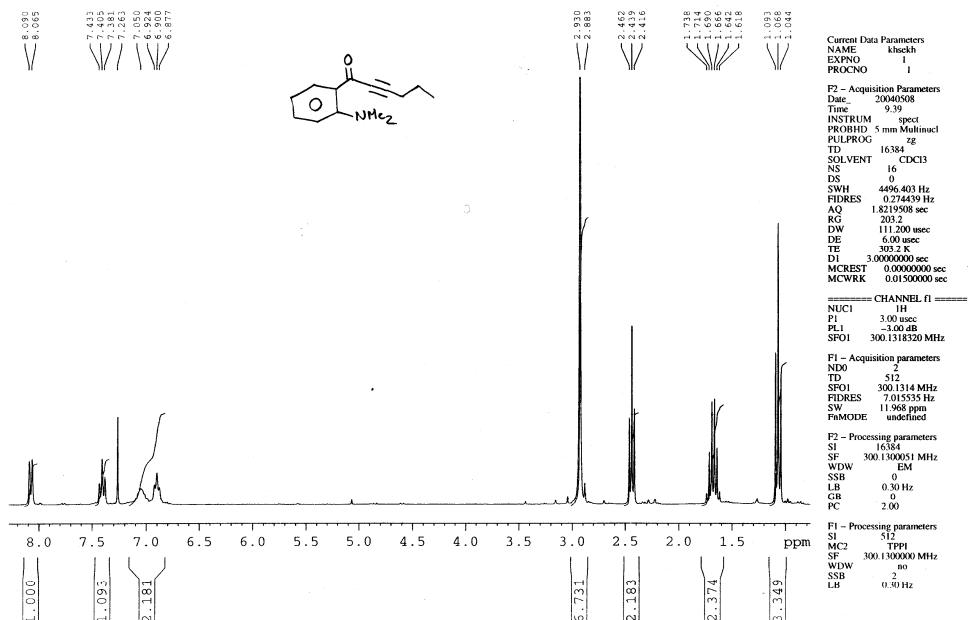

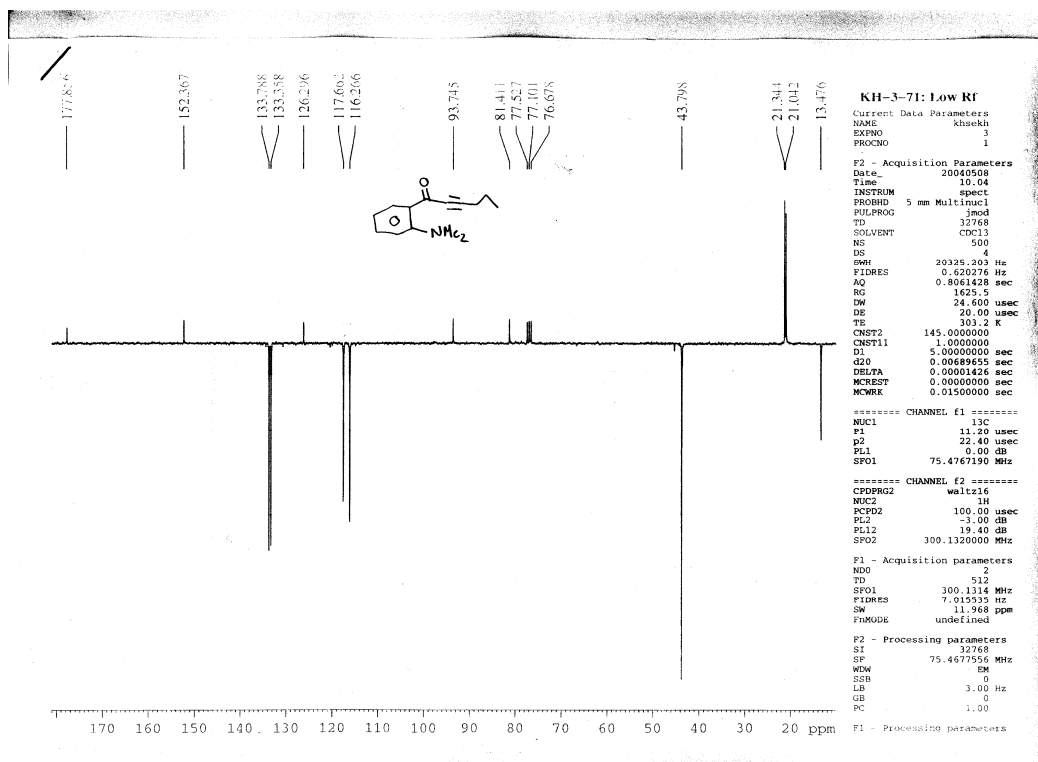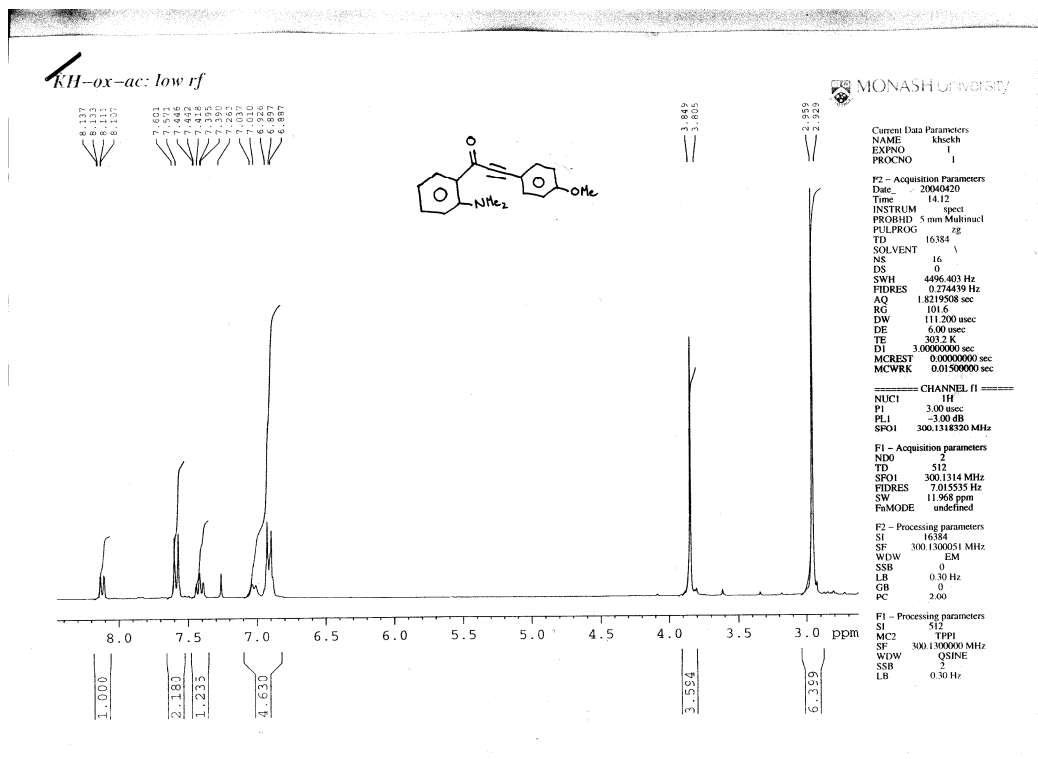



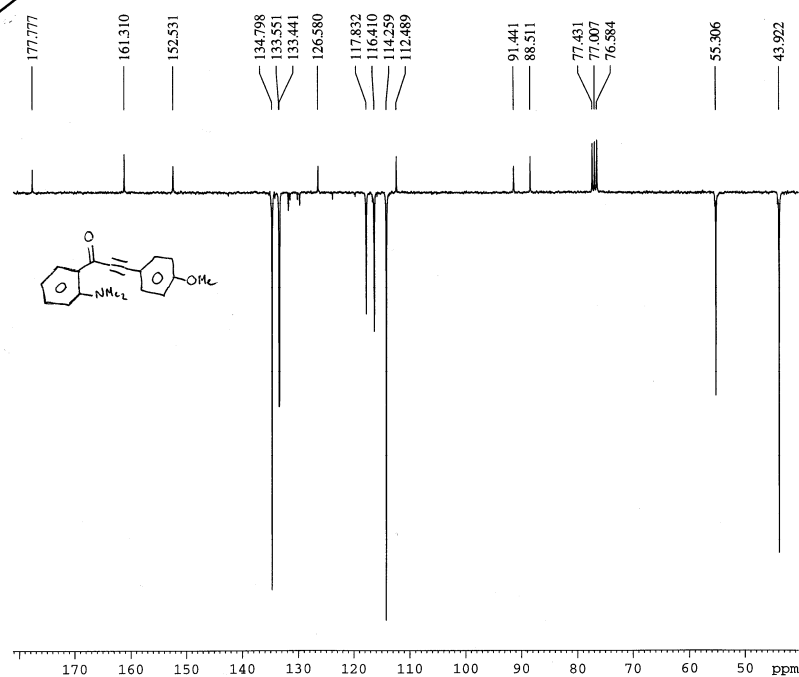

Current Data Parameters  
NAME khsekh  
EXPNO 6  
PROCNO 1

F2 - Acquisition Parameters  
Date\_ 20040916  
Time 8.57  
INSTRUM spect  
PROBHD 5 mm Multinucl  
PULPROG zgpg30  
TD 32768  
SOLVENT CDCl3  
NS 5313  
DS 4  
SWH 20328.203 Hz  
FIDRES 0.620276 Hz  
AQ 0.8061428 sec  
RG 2048  
DW 24.600 usec  
DE 20.00 usec  
TE 303.2 K  
CNST2 145.0000000  
CNST11 1.0000000  
D1 6.00000000 sec  
d20 0.00689655 sec  
DELTA 0.00001428 sec  
MCREST 0.00000000 sec  
MCWRK 0.01500000 sec

===== CHANNEL f1 =====  
NUC1 13C  
P1 11.20 usec  
P2 22.40 usec  
PL1 0.00 dB  
SFO1 75.4767190 MHz

===== CHANNEL f2 =====  
CPDPRG2 waltz16  
NUC2 1H  
PCPD2 100.00 usec  
PL2 -3.00 dB  
PL12 19.40 dB  
SFO2 300.1320000 MHz

F2 - Processing parameters  
SI 32768  
SF 75.4677556 MHz  
WDW EM  
SSB 0  
LB 3.00 Hz  
GB 0  
PC 1.00

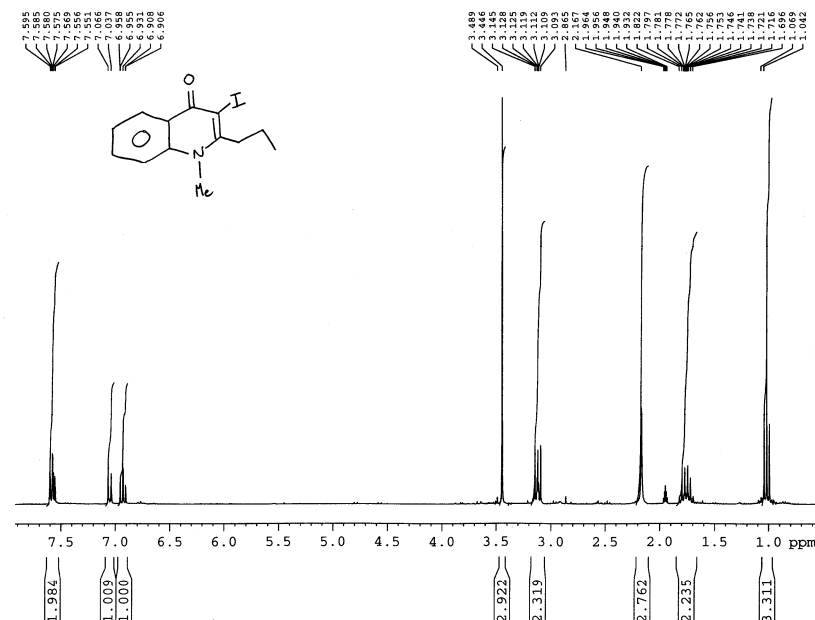

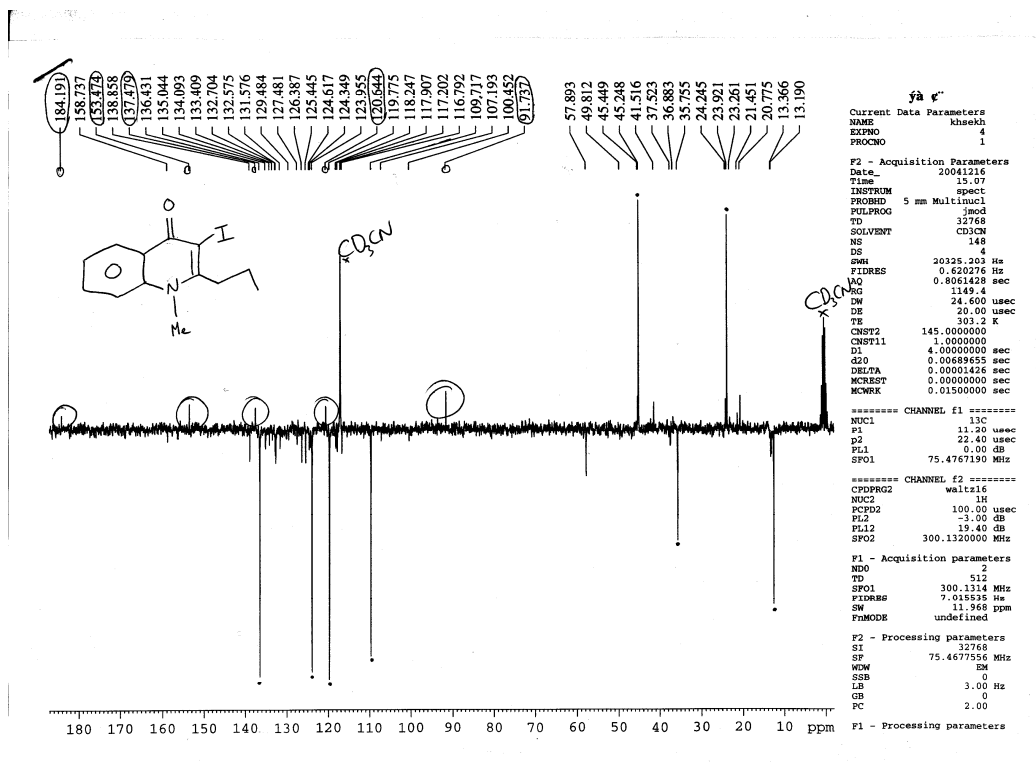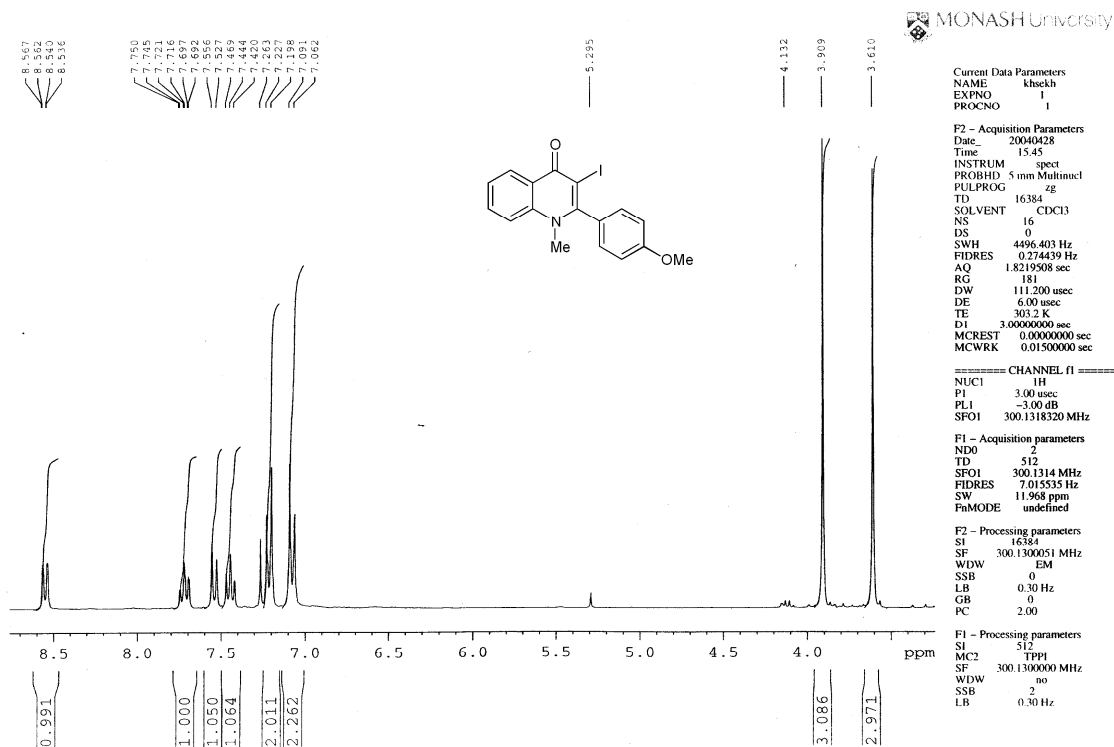

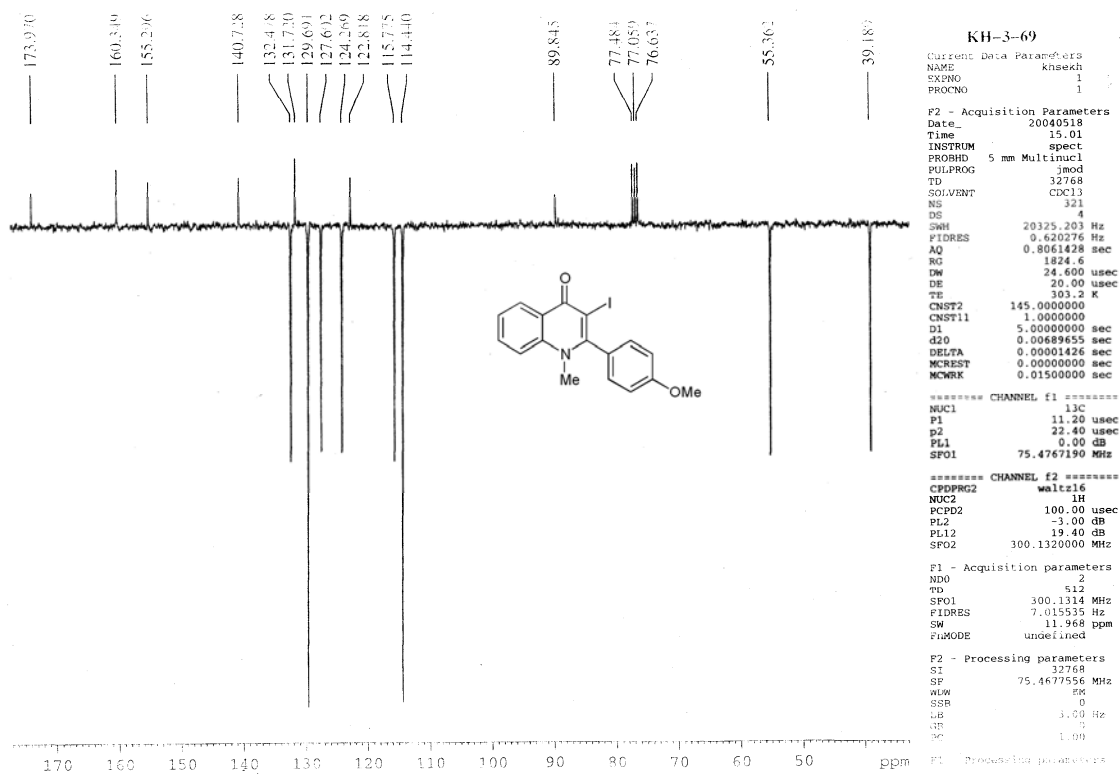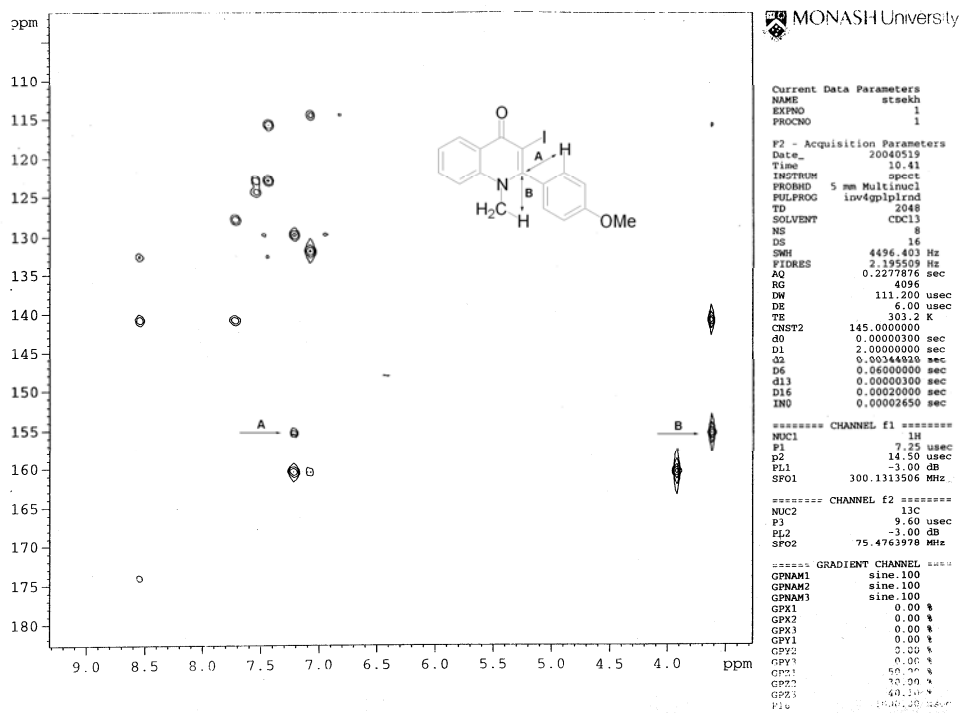

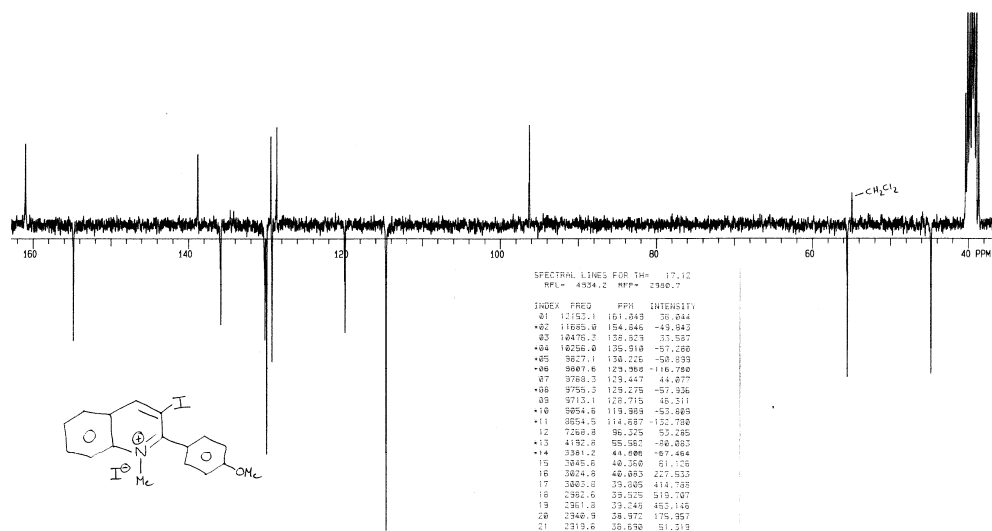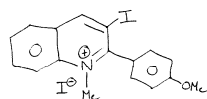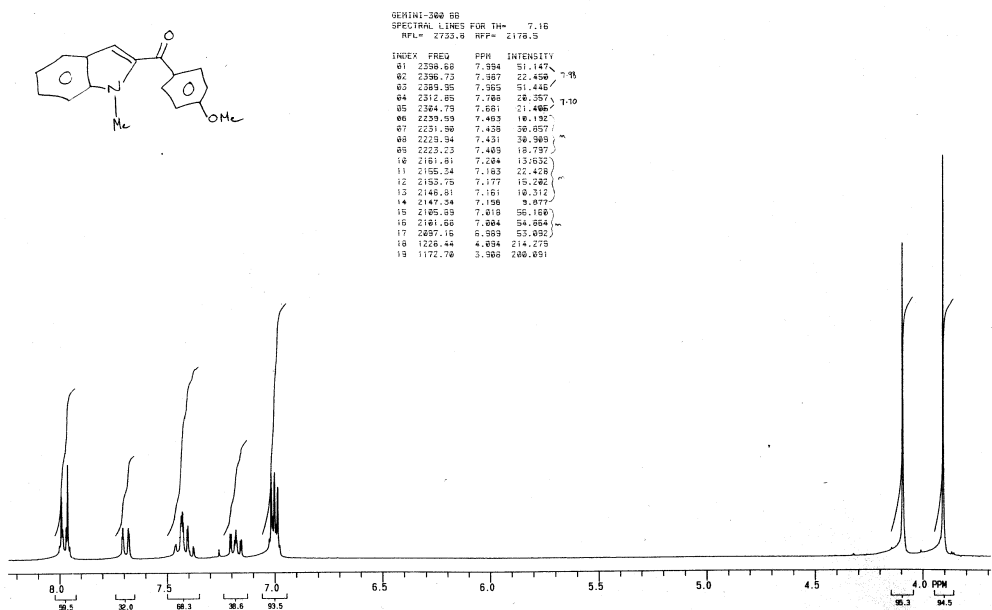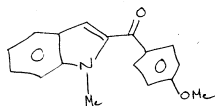

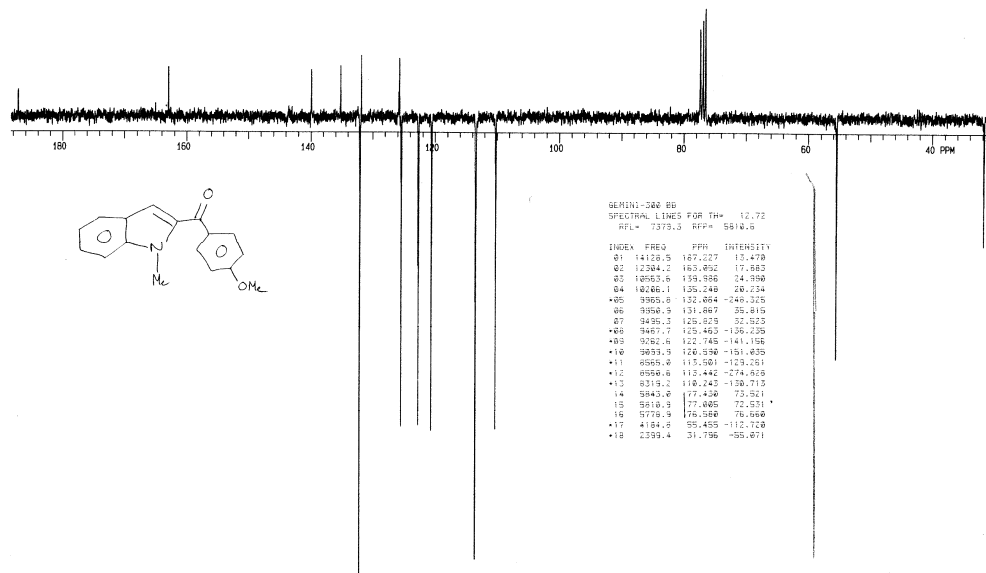

KH-1612

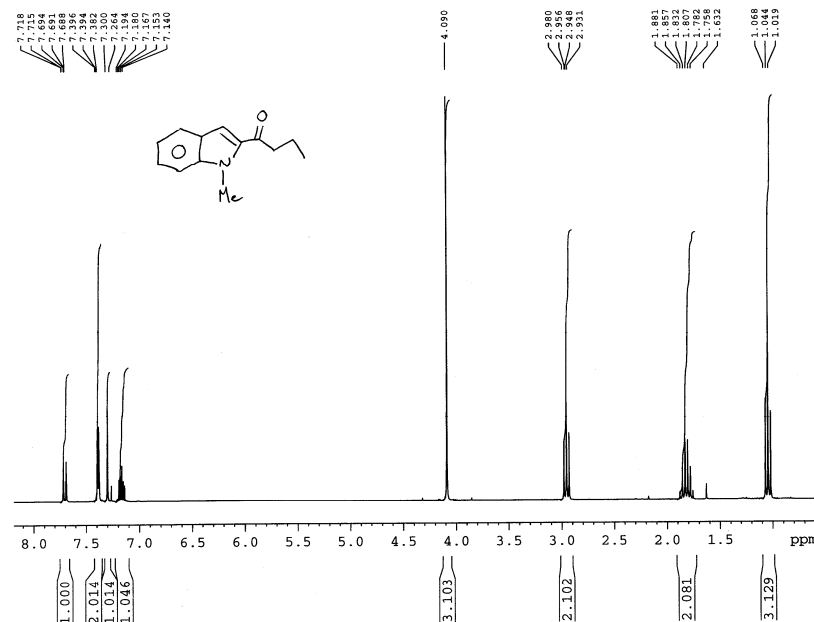

MONASH University

Current Data Parameters  
NAME khesh  
EXPNO 1  
PROCNO 1

F2 - Acquisition Parameters  
Date\_ 20041117  
Time 17:43  
INSTRUM spect  
PROBHD 5 mm Multinucl  
PULPROG zg  
TD 16384  
SOLVENT CDCl3  
NS 16  
DS 0  
SWH 4496.403 Hz  
FIDRES 0.274439 Hz  
AQ 1.8219508 sec  
RG 64  
DW 111.200 usec  
DE 6.00 usec  
TE 303.2 K  
D1 3.0000000 sec  
MCREST 0.0000000 sec  
MCWRE 0.01500000 sec

CHANNEL f1  
NUC1 1H  
P1 3.00 usec  
PL1 -3.00 dB  
SFO1 300.1318320 MHz

F1 - Acquisition parameters  
ND0 2  
TD 512  
SFO1 300.1314 MHz  
FIDRES 7.015535 Hz  
SW 11.968 ppm  
F0MODE undefined

F2 - Processing parameters  
SI 16384  
SF 300.1300051 MHz  
WDW EM  
SSB 0  
LB 0.30 Hz  
GB 0  
PC 2.00

F1 - Processing parameters  
SI 512  
MC2 TPPI  
SF 300.1300000 MHz  
WDW no  
SSB 2  
LB 0.30 Hz

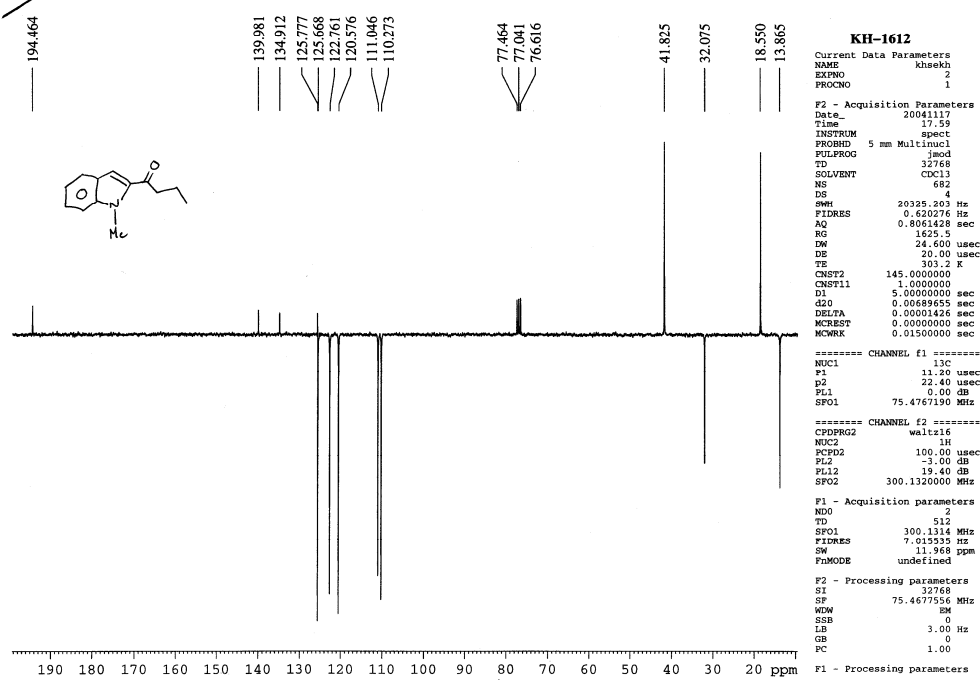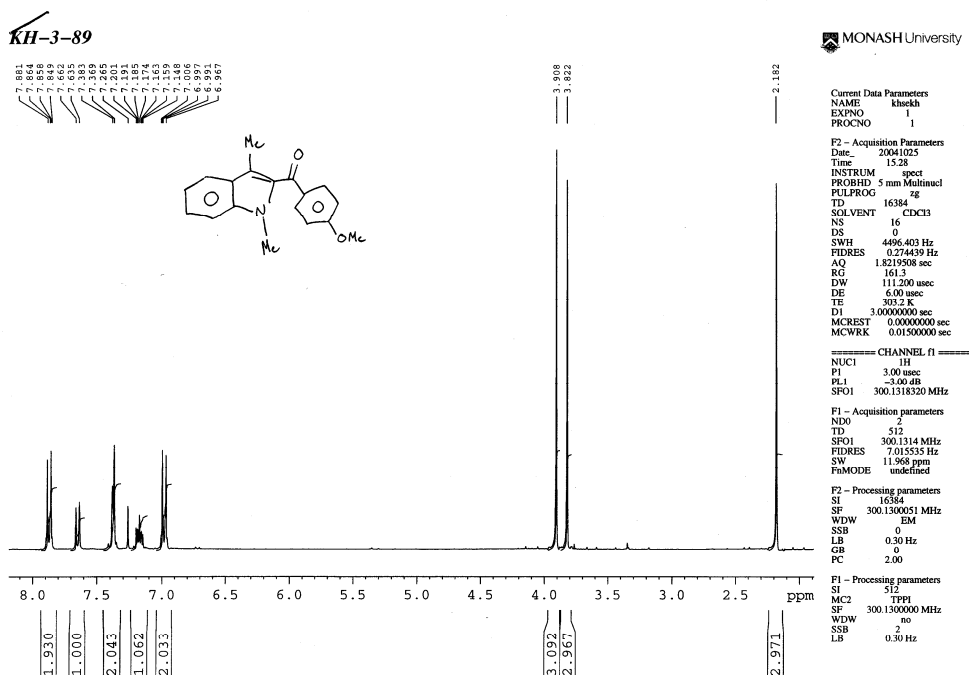

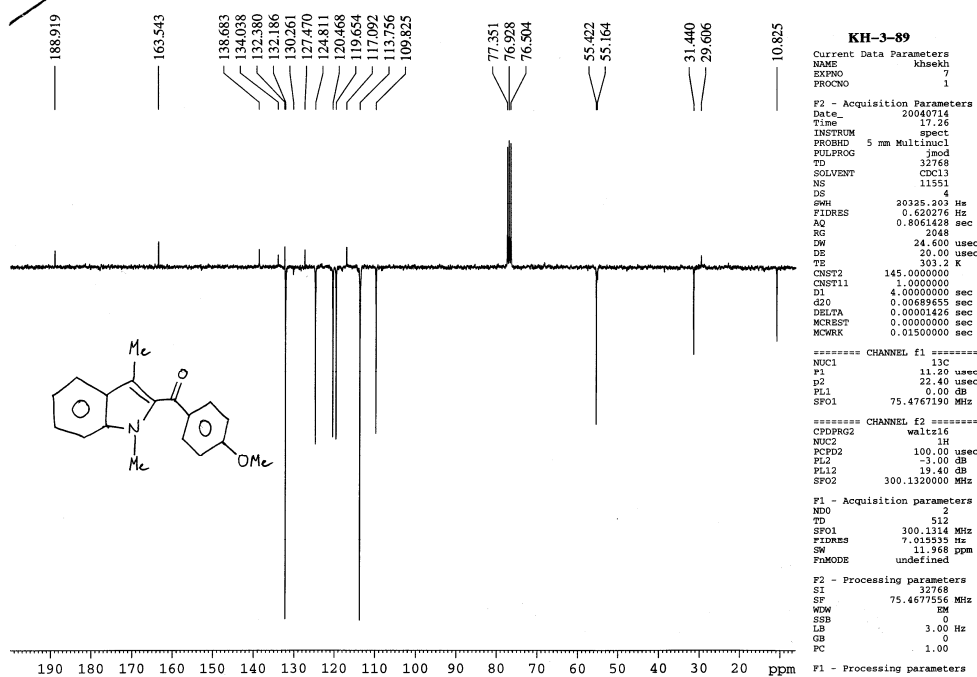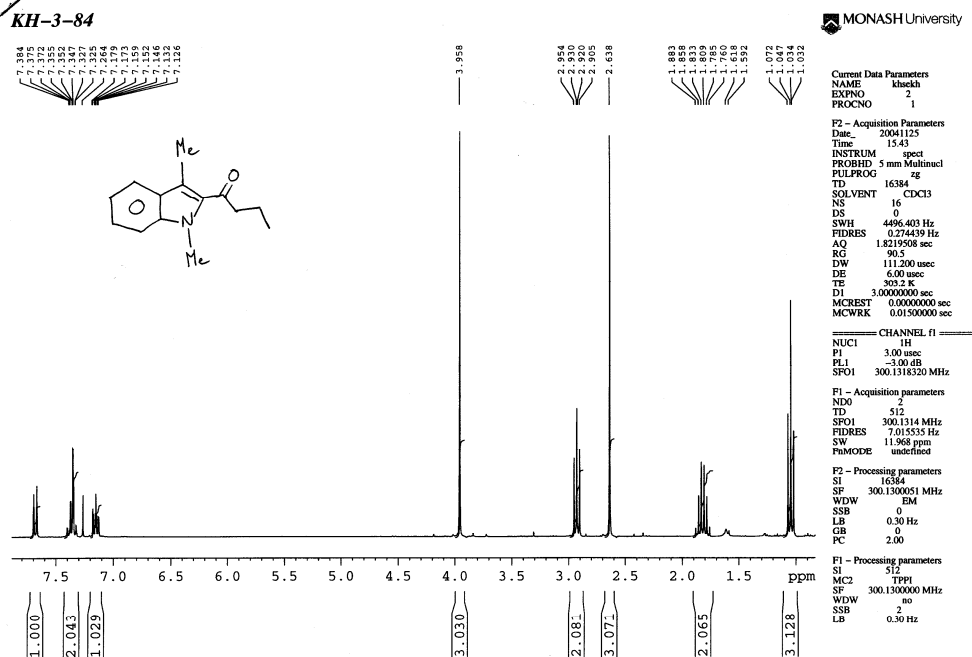

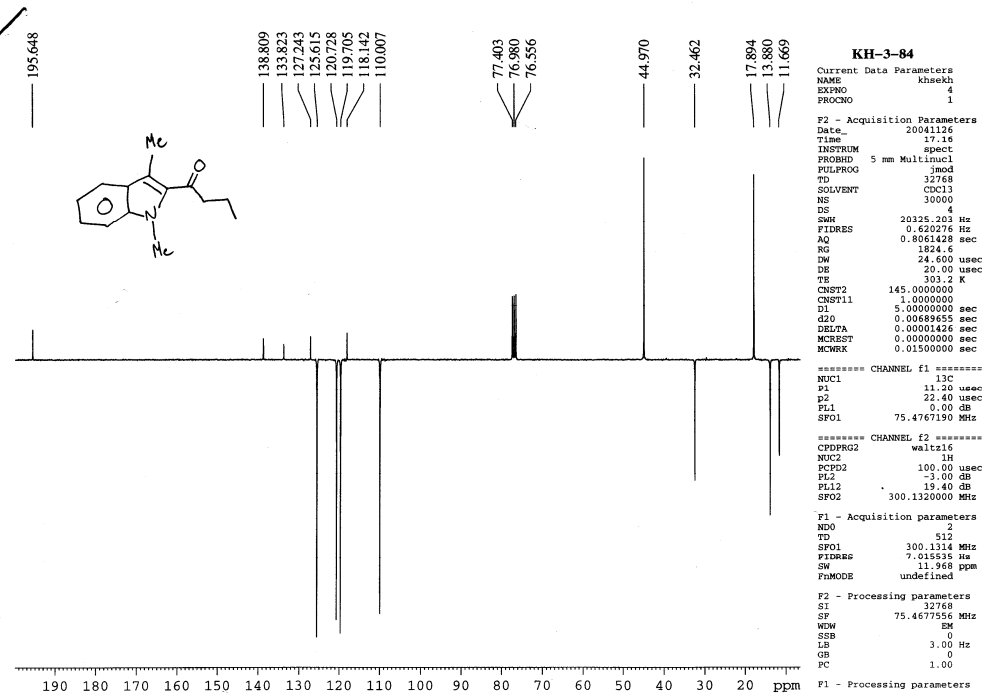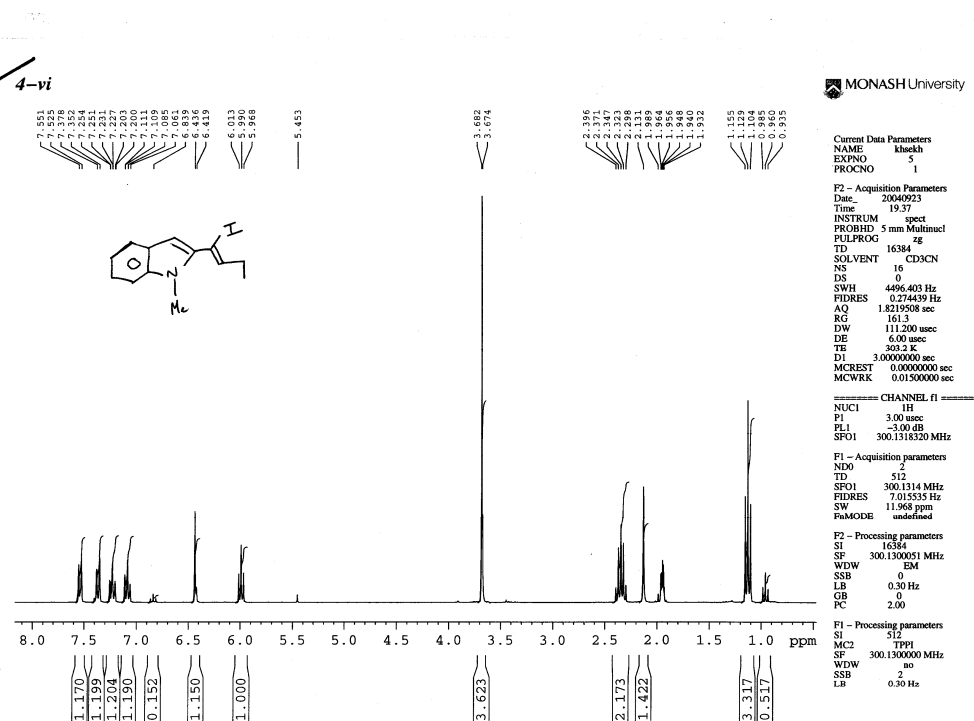



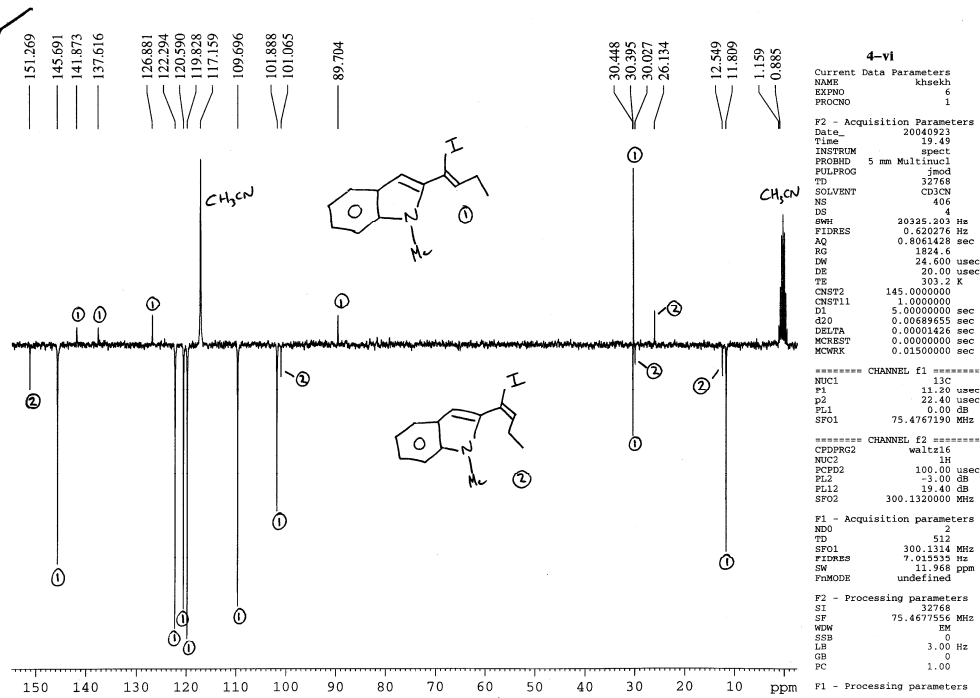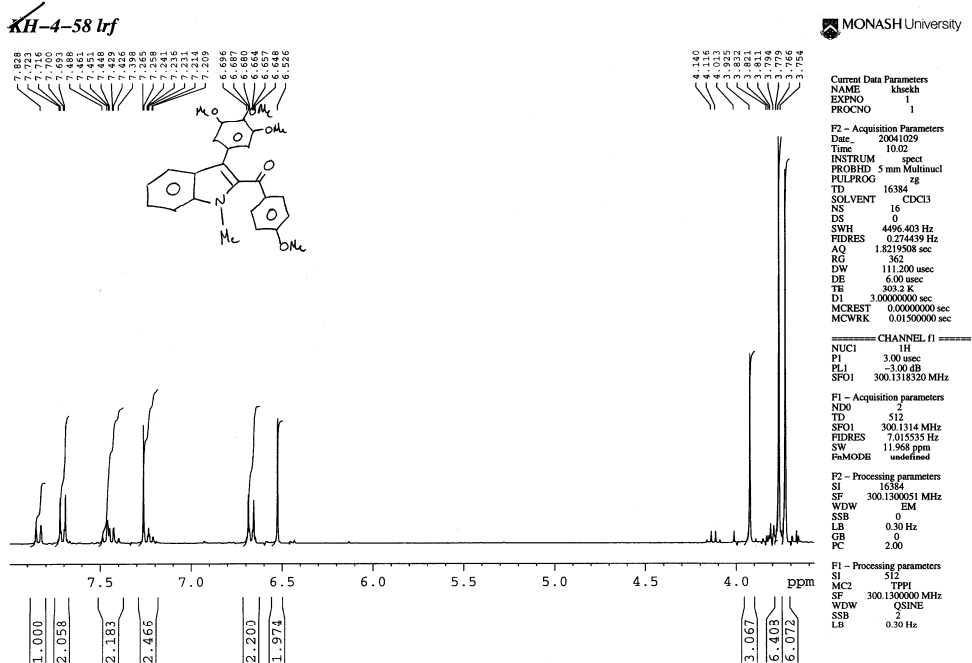

KH-4-66

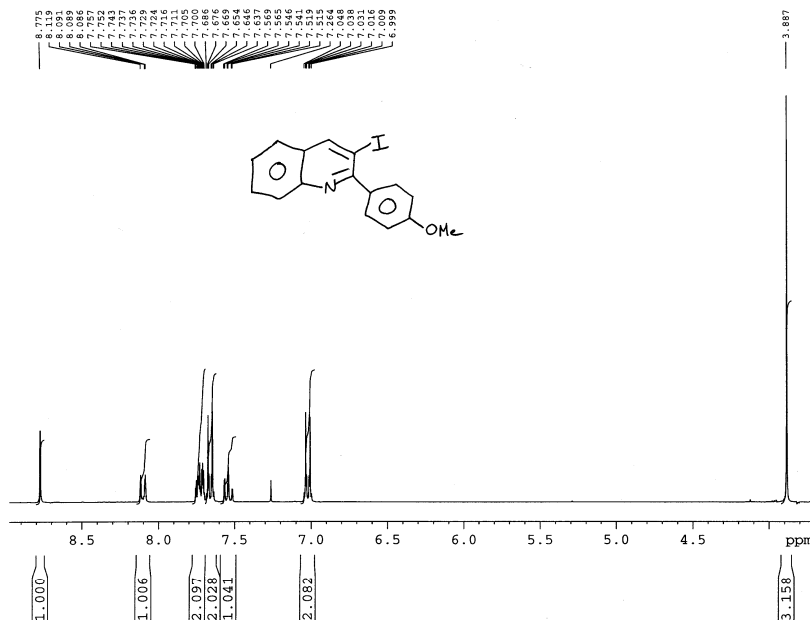

MONASH University

Current Data Parameters  
NAME khshk  
EXPNO 7  
PROCNO 1

F2 - Acquisition Parameters  
Date\_ 20050303  
Time 18.01  
INSTRUM spect  
PROBHD 5 mm Multinuc  
PULPROG zg  
TD 16384  
SOLVENT CDCl3  
NS 16  
DS 0  
SWH 4496.403 Hz  
FIDRES 0.274439 Hz  
AQ 1.8219508 sec  
RG 101.6  
DW 111.200 usec  
DE 6.00 usec  
TE 303.2 K  
DI 3.0000000 sec  
MCREST 0.0000000 sec  
MCWRK 0.0150000 sec

CHANNEL f1  
NUC1 1H  
P1 3.00 usec  
PL1 -3.00 dB  
SFO1 300.1318320 MHz

F1 - Acquisition parameters  
ND0 2  
TD 512  
SFO1 300.1314 MHz  
FIDRES 7.015353 Hz  
SW 11.968 ppm  
FMODE undefined

F2 - Processing parameters  
SI 16384  
SF 300.130051 MHz  
WDW EM  
SSB 0  
LB 0.30 Hz  
GB 0  
PC 2.00

F1 - Processing parameters  
SI 512  
MC2 TPPH  
SF 300.130000 MHz  
WDW no  
SSB 2  
LB 0.30 Hz

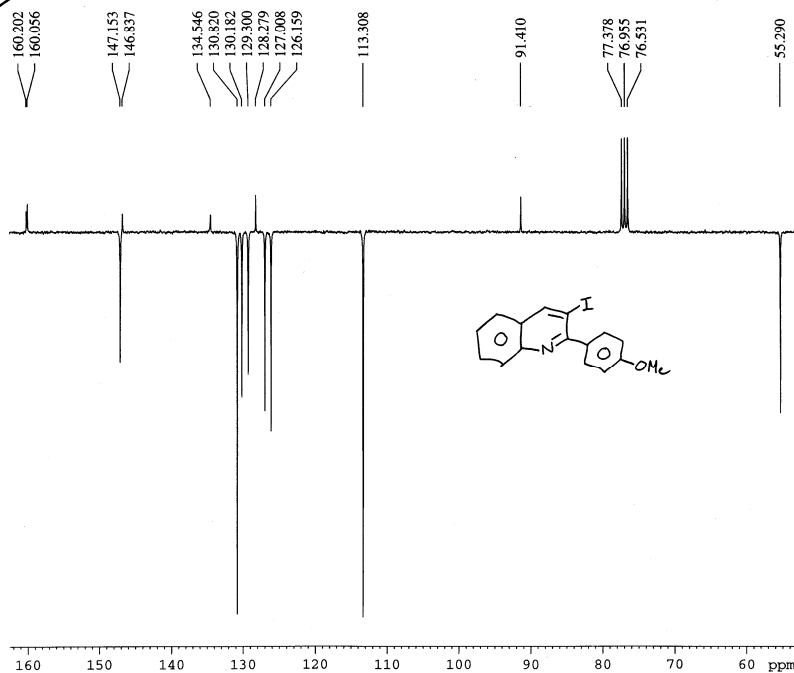

KH-4-66

Current Data Parameters  
NAME khshk  
EXPNO 8  
PROCNO 1

F2 - Acquisition Parameters  
Date\_ 20050303  
Time 18.09  
INSTRUM spect  
PROBHD 5 mm Multinuc  
PULPROG jnad  
TD 32768  
SOLVENT CDCl3  
NS 9253  
DS 4  
SWH 20325.203 Hz  
FIDRES 0.620276 Hz  
AQ 0.8061428 sec  
RG 1824.6  
DW 24.600 usec  
DE 20.00 usec  
TE 303.2 K  
CNST2 145.0000000  
CNST1 1.0000000  
D1 5.00000000 sec  
d20 0.00689655 sec  
DELTA 0.00001426 sec  
MCREST 0.0000000 sec  
MCWRK 0.0150000 sec

CHANNEL f1  
NUC1 13C  
P1 11.20 usec  
PL1 22.40 dB  
PL2 0.00 dB  
SFO1 75.4767190 MHz

CHANNEL f2  
CPDPRG2 waltz16  
NUC2 1H  
PCPD2 100.00 usec  
PL2 -3.00 dB  
PL12 19.40 dB  
SFO2 300.1320000 MHz

F1 - Acquisition parameters  
ND0 2  
TD 512  
SFO1 300.1314 MHz  
FIDRES 7.015353 Hz  
SW 11.968 ppm  
FMODE undefined

F2 - Processing parameters  
SI 32768  
SF 75.4677556 MHz  
WDW EM  
SSB 0  
LB 3.00 Hz  
GB 0  
PC 1.00

F1 - Processing parameters

KH-4-61

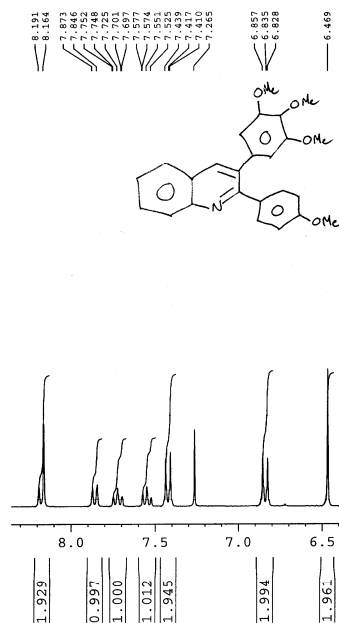

MONASH University

Current Data Parameters  
NAME khsh  
EXPNO 3  
PROCNO 1

F2 - Acquisition Parameters  
Date\_ 20041020  
Time 16.28  
INSTRUM spect  
PROBHD 5 mm Multinuc  
PULPROG zg  
TD 16384  
SOLVENT CDCl3  
NS 64  
DS 0  
SWH 4496.403 Hz  
FIDRES 0.274439 Hz  
AQ 1.8219508 sec  
RG 287.4  
DW 111.200 usec  
DE 6.00 usec  
TE 303.2 K  
D1 3.0000000 sec  
MCREST 0.0000000 sec  
MCWRK 0.0150000 sec

===== CHANNEL f1 =====  
NUC1 1H  
P1 3.00 usec  
PL1 3.00 dB  
SFO1 300.1318330 MHz

F1 - Acquisition parameters  
NDO 2  
TD 512  
SFO1 300.1314 MHz  
FIDRES 7.015535 Hz  
SW 11.968 ppm  
FMODE undefined

F2 - Processing parameters  
SI 16384  
SF 300.130051 MHz  
WDW EM  
SSB 0  
LB 0.30 Hz  
GB 0  
PC 2.00

F1 - Processing parameters  
SI 512  
MC2 TPP1  
SF 300.130000 MHz  
WDW no  
SSB 2  
LB 0.30 Hz

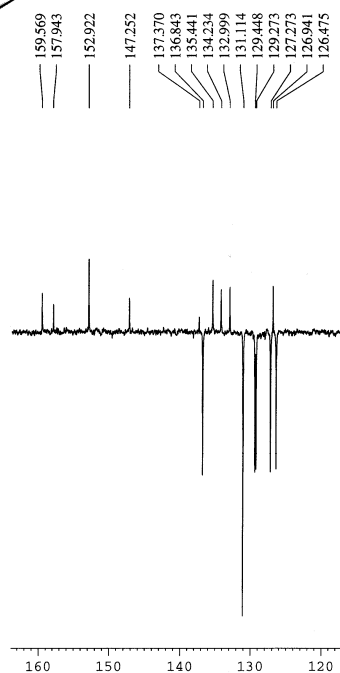

KH-Suzuki Coupling: ac #2

Current Data Parameters  
NAME khsh  
EXPNO 6  
PROCNO 1

F2 - Acquisition Parameters  
Date\_ 20041020  
Time 9.00  
INSTRUM spect  
PROBHD 5 mm Multinuc  
PULPROG jmod  
TD 32768  
SOLVENT CDCl3  
NS 6751  
DS 4  
SWH 20325.203 Hz  
FIDRES 0.620276 Hz  
AQ 0.8061428 sec  
RG 1824.6  
DW 24.600 usec  
DE 20.00 usec  
TE 303.2 K  
CHST2 145.0000000 sec  
CNST11 1.0000000  
D1 5.00000000 sec  
d20 0.0068955 sec  
DELTA 0.00001426 sec  
MCREST 0.0000000 sec  
MCWRK 0.0150000 sec

===== CHANNEL f1 =====  
NUC1 13C  
P1 11.20 usec  
PL1 22.40 dB  
SFO1 75.4767190 MHz

===== CHANNEL f2 =====  
CPDPRG2 waltz16  
NUC2 1H  
PCPD2 100.00 usec  
PL2 -3.00 dB  
PL12 19.40 dB  
SFO2 300.1320000 MHz

F1 - Acquisition parameters  
NDO 2  
TD 512  
SFO1 300.1314 MHz  
FIDRES 7.015535 Hz  
SW 11.968 ppm  
FMODE undefined

F2 - Processing parameters  
SI 32768  
SF 75.4677556 MHz  
WDW EM  
SSB 0  
LB 3.00 Hz  
GB 0  
PC 1.00

F1 - Processing parameters

KH-4-56

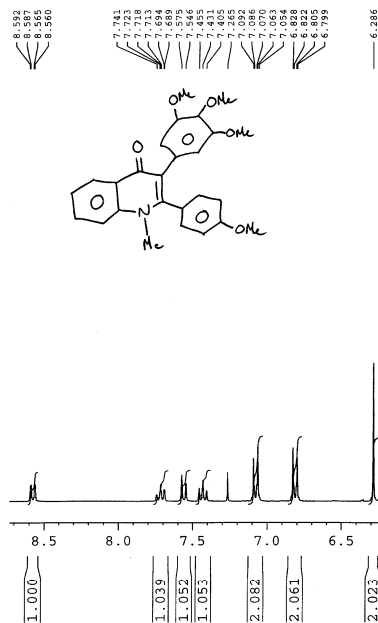

MONASH University

Current Data Parameters  
NAME khsh  
EXPNO 1  
PROCNO 1

F2 - Acquisition Parameters  
Date\_ 20041018  
Time 13.42  
INSTRUM spect  
PROBHD 5 mm Multinucl  
PULPROG zg  
TD 16384  
SOLVENT CDC13  
NS 16  
DS 0  
SWH 4496.403 Hz  
FIDRES 0.274439 Hz  
AQ 1.8219508 sec  
RG 114  
DW 111.200 usec  
DE 6.00 usec  
TE 303.2 K  
D1 3.0000000 sec  
MCREST 0.0000000 sec  
MCWRK 0.0150000 sec

===== CHANNEL f1 =====  
NUC1 1H  
P1 3.00 usec  
PL1 -3.00 dB  
SFO1 300.1318320 MHz

F1 - Acquisition parameters  
NUC1 1H  
P1 3.00 usec  
PL1 -3.00 dB  
SFO1 300.1318320 MHz

F2 - Processing parameters  
SI 16384  
SF 300.1300051 MHz  
WDW EM  
SSB 0  
LB 0.30 Hz  
GB 0  
PC 2.00

F1 - Processing parameters  
SI 512  
MC2 FWH  
SF 300.1300000 MHz  
WDW no  
SSB 2  
LB 0.30 Hz

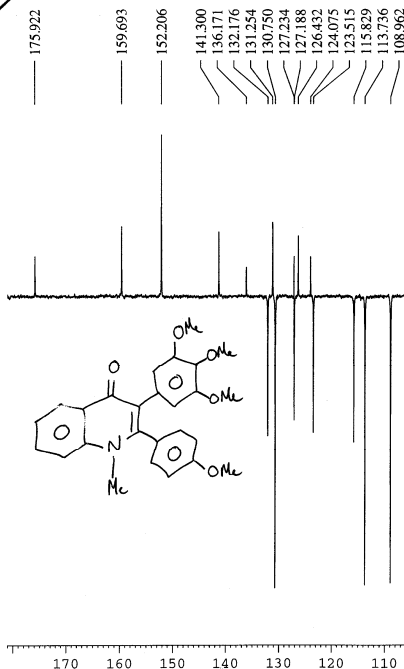

KH-4-56

Current Data Parameters  
NAME khsh  
EXPNO 4  
PROCNO 1

F2 - Acquisition Parameters  
Date\_ 20041006  
Time 19.57  
INSTRUM spect  
PROBHD 5 mm Multinucl  
FULPROG jmod  
TD 32768  
SOLVENT CDC13  
NS 5138  
DS 4  
SWH 20325.203 Hz  
FIDRES 0.620276 Hz  
AQ 0.8061428 sec  
RG 2048  
DW 24.600 usec  
DE 20.00 usec  
TE 303.2 K  
CNST2 145.0000000  
CNST11 1.0000000  
D1 8.0000000 sec  
D2 0.01689655 sec  
DELTA 0.00001426 sec  
MCREST 0.0000000 sec  
MCWRK 0.0150000 sec

===== CHANNEL f1 =====  
NUC1 13C  
P1 11.20 usec  
PL1 22.40 dB  
PL2 0.00 dB  
SFO1 75.4767190 MHz

===== CHANNEL f2 =====  
CPDPRG2 waltz16  
NUC2 1H  
PCPD2 100.00 usec  
PL2 3.00 dB  
PL12 19.40 dB  
SFO2 300.1320000 MHz

F1 - Acquisition parameters  
NUC1 1H  
P1 3.00 usec  
PL1 -3.00 dB  
SFO1 300.1318320 MHz

F2 - Processing parameters  
SI 32768  
SF 75.4677556 MHz  
WDW EM  
SSB 0  
LB 3.00 Hz  
GB 0  
PC 1.00

F1 - Processing parameters
